# Supplementary material for: Coding and non-coding gene regulatory networks underlie the immune response in liver cirrhosis
Source: PubMed Central journal article supplement (PMC5371304; doi:10.1371/journal.pone.0174142), 2017-03-29
Supplement: pone.0174142.s001.pdf [file pone.0174142.s001.pdf]

Supplementary Table 1. The differentially expressed coding and non-coding genes in liver cirrhosis.

| lncRNA Symbol     | log2FC       | P.Value     | FDR         |
|-------------------|--------------|-------------|-------------|
| SMIM12-001        | -2.428026518 | 2.52E-07    | 0.000903833 |
| FAM99B-001        | -3.104556194 | 0.000102662 | 0.028274226 |
| RP11-535A19.1-001 | -2.234307887 | 6.48E-06    | 0.007736147 |
| PLEKHG6-001       | -1.239219352 | 0.00036209  | 0.049953853 |
| PLEKHG6-003       | -1.239219352 | 0.00036209  | 0.049953853 |
| TUSC8-001         | -2.192614128 | 7.89E-05    | 0.024569693 |
| LINC00238-006     | -1.463838638 | 6.49E-05    | 0.024092451 |
| LINC00238-001     | -1.463838638 | 6.49E-05    | 0.024092451 |
| LINC00238-005     | -1.463838638 | 6.49E-05    | 0.024092451 |
| LINC00238-004     | -1.463838638 | 6.49E-05    | 0.024092451 |
| LINC00238-002     | -1.463838638 | 6.49E-05    | 0.024092451 |
| ABAT-004          | -1.450677846 | 3.55E-05    | 0.021772174 |
| U91319.1-002      | -2.30367014  | 1.54E-05    | 0.016574622 |
| ABCC6P1-004       | -3.352301892 | 4.78E-05    | 0.023328775 |
| AOC4P-006         | -2.565863472 | 0.000208042 | 0.042232157 |
| HPN-AS1-001       | -2.296245175 | 0.000302842 | 0.045674063 |
| CYP2B7P-006       | -3.651062474 | 0.000231955 | 0.042955756 |
| CYP2B7P-001       | -3.651062474 | 0.000231955 | 0.042955756 |
| DGCR5-001         | -2.373700203 | 0.000100774 | 0.028274226 |
| C1QTNF6-002       | -1.630286065 | 4.68E-05    | 0.023328775 |
| RP11-71E19.1-001  | -1.638610195 | 0.000197158 | 0.042232157 |
| RP11-372E1.4-001  | -3.133938887 | 6.71E-05    | 0.024092451 |
| RP11-328K4.1-002  | -2.79053328  | 7.05E-05    | 0.024092451 |
| LINC01554-003     | -4.384885728 | 1.58E-08    | 0.000170111 |
| LINC01554-001     | -3.407856568 | 8.76E-07    | 0.002351978 |
| AC004538.3-010    | -2.557557759 | 3.77E-06    | 0.006744772 |
| AC004538.3-001    | -2.439392813 | 5.57E-06    | 0.007475873 |
| AC004538.3-004    | -2.557557759 | 3.77E-06    | 0.006744772 |
| CTA-315H11.2-001  | -2.537697365 | 0.000252307 | 0.043209056 |
| RP11-115J16.1-001 | -3.118141739 | 4.10E-08    | 0.000220044 |
| ATP8B5P-001       | -1.187034919 | 0.000217806 | 0.04253553  |
| PCAT7-001         | -1.151206751 | 0.000250438 | 0.043209056 |
| SNHG12-002        | 1.119232528  | 0.0002588   | 0.043209056 |
| ENAH-004          | 1.518121133  | 0.000324978 | 0.047816254 |
| MARVELD1-001      | 2.047279763  | 2.41E-05    | 0.021554673 |
| RP11-693N9.2-002  | 1.445113959  | 8.01E-05    | 0.024569693 |
| RP11-693N9.2-009  | 1.445113959  | 8.01E-05    | 0.024569693 |
| RP11-617F23.1-001 | 1.498338759  | 0.000306166 | 0.045674063 |
| MCTP2-004         | 2.425649733  | 0.000130288 | 0.034132304 |
| CTD-2135D7.2-002  | 1.530047056  | 0.000334616 | 0.047921487 |
| CTD-2135D7.2-001  | 1.530047056  | 0.000334616 | 0.047921487 |

|                   |              |             |             |
|-------------------|--------------|-------------|-------------|
| CTD-3195I5.1-001  | 1.270080848  | 0.000208095 | 0.042232157 |
| CTD-2020K17.1-001 | 1.705608679  | 0.000251817 | 0.043209056 |
| C1QTNF1-AS1-001   | 2.987848786  | 0.000291141 | 0.044673501 |
| C1QTNF1-AS1-002   | 2.987848786  | 0.000291141 | 0.044673501 |
| CTC-241F20.3-001  | 2.139399464  | 0.00010707  | 0.028750984 |
| ZNF667-AS1-003    | 1.551308409  | 4.05E-05    | 0.021772174 |
| ZNF667-AS1-001    | 1.551308409  | 4.05E-05    | 0.021772174 |
| ZNF667-AS1-004    | 1.551308409  | 4.05E-05    | 0.021772174 |
| ZNF667-AS1-008    | 1.551308409  | 4.05E-05    | 0.021772174 |
| ZNF667-AS1-002    | 1.551308409  | 4.05E-05    | 0.021772174 |
| ZNF667-AS1-005    | 1.551308409  | 4.05E-05    | 0.021772174 |
| ZNF667-AS1-009    | 1.551308409  | 4.05E-05    | 0.021772174 |
| RNF144A-AS1-005   | 1.98558292   | 0.000242559 | 0.043209056 |
| RNF103-CHMP3-002  | 1.074602891  | 0.000284082 | 0.044673501 |
| ANKRD36BP2-003    | 1.410132644  | 0.000261483 | 0.043209056 |
| ANKRD36BP2-001    | 1.410132644  | 0.000261483 | 0.043209056 |
| MBD5-001          | 1.491917021  | 0.00036276  | 0.049953853 |
| LINC00471-001     | 1.261300425  | 0.000186286 | 0.042232157 |
| C22orf34-002      | 2.039295427  | 0.000226455 | 0.042955756 |
| DCP2-004          | 1.650563039  | 0.000201334 | 0.042232157 |
| BTN3A2-017        | 2.013105118  | 6.38E-05    | 0.024092451 |
| FABP5P3-001       | 2.466494317  | 5.40E-06    | 0.007475873 |
| PGM5P3-AS1-001    | 1.990267691  | 7.18E-05    | 0.024092451 |
| PGM5P3-AS1-003    | 1.990267691  | 7.18E-05    | 0.024092451 |
| DOCK8-018         | 2.196289158  | 8.64E-05    | 0.025093977 |
| DOCK8-001         | 2.356207626  | 1.82E-05    | 0.017767296 |
| DOCK8-010         | 2.196289158  | 8.64E-05    | 0.025093977 |
| GGTA1P-005        | 1.960989542  | 0.000276707 | 0.044359825 |
| GGTA1P-004        | 1.960989542  | 0.000276707 | 0.044359825 |
| mRNA Symbol       | log2FC       | P.Value     | FDR         |
| NAT2              | -2.087901987 | 0.004749354 | 0.042139419 |
| AGT               | -3.278357195 | 0.000251855 | 0.01169459  |
| AGXT              | -2.45738476  | 0.000736365 | 0.016396702 |
| ALDOB             | -3.272684994 | 0.000578076 | 0.014895881 |
| APOA1             | -2.257465921 | 0.001304911 | 0.020787074 |
| APOC3             | -1.995393923 | 0.001634386 | 0.023448789 |
| APOH              | -2.672517655 | 0.000564534 | 0.014719698 |
| AR                | -2.625980991 | 0.000759156 | 0.016486247 |
| ARG1              | -3.947734534 | 0.001246025 | 0.020340824 |
| ARSE              | -2.762312508 | 0.00068395  | 0.015932657 |
| BCKDHB            | -2.090016193 | 0.002814545 | 0.031010118 |
| C2                | -1.099629192 | 0.001345805 | 0.021135344 |
| C3                | -2.062344485 | 0.000477275 | 0.013647112 |
| C6                | -3.039797035 | 0.001727788 | 0.024144095 |

|          |              |             |             |
|----------|--------------|-------------|-------------|
| C8B      | -3.590886114 | 0.001153355 | 0.019497347 |
| CA2      | -2.054082636 | 0.000296321 | 0.012102504 |
| CBS      | -2.900110055 | 0.000425208 | 0.013045227 |
| CNGA1    | -2.317184994 | 0.001416004 | 0.021775325 |
| EPHX1    | -1.551141727 | 0.000923984 | 0.017880184 |
| F11      | -3.649967542 | 0.000277472 | 0.012003271 |
| F5       | -2.534308686 | 0.000330411 | 0.012254849 |
| F7       | -1.831650871 | 0.003530313 | 0.035364733 |
| F9       | -2.993700966 | 0.000449199 | 0.013349109 |
| FANCC    | -1.694492129 | 0.000878765 | 0.017658338 |
| FAH      | -2.038676961 | 0.001697548 | 0.023884852 |
| FGFR3    | -2.983527857 | 0.000391796 | 0.012854122 |
| FH       | -1.267109278 | 0.002461116 | 0.028868277 |
| G6PC     | -2.868192584 | 0.001547396 | 0.022793387 |
| GALK1    | -2.096319242 | 8.83E-06    | 0.004370993 |
| GAMT     | -2.183969519 | 0.001418553 | 0.021775325 |
| GCDH     | -1.902655763 | 0.001088879 | 0.019033012 |
| GCH1     | -1.171612154 | 0.004295732 | 0.039893195 |
| GHR      | -2.327712671 | 6.36E-05    | 0.008063947 |
| GJB1     | -2.974251359 | 0.003090838 | 0.032862276 |
| GLDC     | -2.700904506 | 0.000651856 | 0.015472375 |
| SERPIND1 | -2.427979322 | 0.000668989 | 0.015720572 |
| CFH      | -2.339480292 | 0.001544947 | 0.022773745 |
| HGD      | -3.132783082 | 0.002545307 | 0.029375342 |
| HMGCL    | -1.541181925 | 0.004001961 | 0.038399232 |
| CFI      | -1.887685423 | 0.00057732  | 0.014895881 |
| LCAT     | -2.065892481 | 5.93E-05    | 0.008053145 |
| LIPC     | -3.448604587 | 0.000438994 | 0.013160785 |
| MAOA     | -2.044386618 | 0.001594838 | 0.023141585 |
| MBL2     | -2.816473431 | 0.002309532 | 0.027873334 |
| MET      | -1.344411857 | 0.004297863 | 0.039893195 |
| MTTP     | -3.155994198 | 0.002199513 | 0.02724349  |
| MUT      | -2.206485326 | 0.001121787 | 0.019278478 |
| PAH      | -3.027400324 | 0.001640913 | 0.023472434 |
| PCBD1    | -1.15630032  | 0.003372812 | 0.034395268 |
| PKLR     | -1.284312276 | 0.001615235 | 0.023255735 |
| PLG      | -2.660918903 | 0.000794725 | 0.016744182 |
| PROC     | -2.700883871 | 0.00020285  | 0.011049475 |
| PROS1    | -1.428259878 | 0.001334396 | 0.021029389 |
| PTH1R    | -1.358934467 | 0.000101747 | 0.008967806 |
| SLC2A2   | -3.014495818 | 0.000516444 | 0.014145023 |
| SLC3A1   | -1.547133006 | 0.002269998 | 0.027705534 |
| SRD5A2   | -3.473763322 | 0.000301744 | 0.012141407 |
| TAT      | -3.115324786 | 0.001771048 | 0.024504666 |

|          |              |             |             |
|----------|--------------|-------------|-------------|
| SERPINA7 | -3.223595853 | 0.002939368 | 0.03185251  |
| TTPA     | -2.731952625 | 0.000893279 | 0.017740455 |
| TTR      | -3.790152325 | 5.41E-05    | 0.007939072 |
| XDH      | -2.810807836 | 0.001095463 | 0.019082733 |
| APOB     | -2.616351879 | 0.000723952 | 0.016277754 |
| ABCC2    | -2.98788657  | 0.001933874 | 0.025605119 |
| MAT1A    | -3.306927184 | 0.000801182 | 0.016828126 |
| PON1     | -3.610309381 | 0.000390161 | 0.012854122 |
| HNF4A    | -3.505801858 | 0.000405544 | 0.012957099 |
| HNF1B    | -2.580179554 | 0.004675051 | 0.041862213 |
| ALB      | -2.85899328  | 0.00031079  | 0.012234335 |
| AMT      | -1.065955709 | 0.002425038 | 0.028599867 |
| APOC2    | -2.799085906 | 0.001834246 | 0.024948682 |
| SERPINC1 | -2.335651926 | 0.000719763 | 0.016240629 |
| F10      | -2.359849305 | 0.001062271 | 0.018907867 |
| FGA      | -3.264645374 | 0.001305301 | 0.020787074 |
| FGG      | -2.058964722 | 0.001808689 | 0.024732886 |
| OTC      | -2.682852901 | 0.002373037 | 0.028233055 |
| PCCB     | -1.712448732 | 0.002249249 | 0.027531776 |
| C8A      | -3.023230573 | 0.00223204  | 0.027430074 |
| IL6R     | -1.614555793 | 0.003414316 | 0.034573951 |
| GC       | -2.128266692 | 0.000866771 | 0.017493386 |
| CD14     | -1.276748919 | 0.001902924 | 0.025399147 |
| IGFBP1   | -3.13644695  | 0.003873228 | 0.037629817 |
| ORM1     | -2.332961077 | 0.002073518 | 0.026507793 |
| ORM2     | -1.489914384 | 0.000695741 | 0.016028594 |
| SERPINA5 | -1.548317365 | 0.000739589 | 0.016396702 |
| VTN      | -2.106368369 | 0.000998262 | 0.018471549 |
| IL13RA2  | -1.068472452 | 0.00240288  | 0.028406019 |
| AGL      | -1.348641674 | 0.002115661 | 0.026828519 |
| AGL      | -1.465216267 | 0.000247982 | 0.01169459  |
| ABAT     | -3.26292504  | 0.000555905 | 0.014663262 |
| ADH1A    | -1.900200735 | 0.000617677 | 0.015131243 |
| ADH1B    | -2.650867205 | 0.000637713 | 0.015335149 |
| ADH1C    | -1.59089665  | 0.003584405 | 0.035645009 |
| ADH4     | -2.530469011 | 0.001322488 | 0.020978947 |
| ADH6     | -2.852435738 | 0.000217337 | 0.011351772 |
| ALAS1    | -2.021101435 | 0.00253553  | 0.029295628 |
| ALDH1A1  | -1.480621924 | 0.001442594 | 0.021975426 |
| ALDH2    | -1.600745059 | 0.002150634 | 0.027086582 |
| ALDH1B1  | -1.740898456 | 0.000655712 | 0.015512186 |
| ALDH9A1  | -1.131941072 | 0.001121537 | 0.019278478 |
| C4BPA    | -3.144961743 | 0.002695931 | 0.030242329 |
| C4BPB    | -3.376583628 | 0.001035052 | 0.018646769 |

|          |              |             |             |
|----------|--------------|-------------|-------------|
| CYP2A6   | -3.888251351 | 0.00055363  | 0.014663262 |
| CYP2A7   | -3.757368372 | 0.000475049 | 0.013629768 |
| CYP3A7   | -2.721500342 | 0.002112167 | 0.026828519 |
| CYP2A13  | -3.399716411 | 0.002170978 | 0.027171364 |
| CYP2C19  | -2.951007891 | 0.000583555 | 0.014912856 |
| CYP2C8   | -2.715627437 | 0.0015636   | 0.022899894 |
| CYP2C9   | -3.1601974   | 0.001242937 | 0.020340824 |
| CYP2C18  | -2.595609351 | 0.000818793 | 0.017057636 |
| CYP2E1   | -2.162174775 | 0.000327578 | 0.012254849 |
| CYP2J2   | -2.535463165 | 0.005911001 | 0.048407141 |
| CYP3A5   | -3.958382518 | 0.000563727 | 0.014717464 |
| CYP4A11  | -3.140938553 | 0.000368633 | 0.012603013 |
| CYP7A1   | -2.702356757 | 0.002805295 | 0.030952293 |
| CYP51A1  | -1.958782244 | 0.000988604 | 0.018449123 |
| DBH      | -2.724731166 | 2.91E-05    | 0.006533081 |
| DDC      | -3.090190979 | 0.001190832 | 0.019879011 |
| DRD1     | -1.741139888 | 0.000691052 | 0.016014214 |
| GGCX     | -2.419911827 | 0.001367628 | 0.021379402 |
| GSTA2    | -3.468072531 | 3.42E-05    | 0.007011546 |
| KNG1     | -2.471433945 | 0.001929691 | 0.025598816 |
| CYP4F3   | -2.998015824 | 0.000517533 | 0.014145023 |
| MAOB     | -2.231648232 | 0.001791428 | 0.02460588  |
| MME      | -2.109731584 | 0.00020144  | 0.011049475 |
| NQO2     | -1.446313594 | 0.000694267 | 0.016028594 |
| PC       | -2.794449992 | 0.001894409 | 0.025361483 |
| SERPINF2 | -2.97749369  | 0.00060224  | 0.015063312 |
| PON3     | -3.032458634 | 0.000924973 | 0.017880184 |
| DNAJB3   | -2.906480676 | 4.53E-05    | 0.007487582 |
| UGP2     | -1.41291048  | 0.001295817 | 0.02073307  |
| RORC     | -2.243692627 | 0.00043294  | 0.013136157 |
| TM6SF2   | -1.783370589 | 0.000709197 | 0.016141555 |
| IL17REL  | -1.387878626 | 0.003432996 | 0.034683141 |
| OR13C3   | -1.235791783 | 0.000199092 | 0.011049198 |
| C4B      | -1.078909656 | 0.003109151 | 0.032943118 |
| FMO3     | -3.276377407 | 0.000660259 | 0.015583632 |
| FCRLB    | -1.459585757 | 0.002055588 | 0.02642751  |
| TPD52L1  | -1.512493646 | 0.002238589 | 0.027460704 |
| TPD52L1  | -1.951822471 | 0.001126338 | 0.019278478 |
| AGMO     | -1.933544093 | 0.000622738 | 0.015171623 |
| OR4D10   | -1.650813323 | 0.004947313 | 0.043197604 |
| AK4      | -1.528403592 | 0.000757013 | 0.016486247 |
| HAO2     | -4.007949348 | 0.000171587 | 0.010584994 |
| ERBB3    | -1.596838709 | 0.000669141 | 0.015720572 |
| SDC1     | -2.534877352 | 0.001278432 | 0.020587681 |

|           |              |             |             |
|-----------|--------------|-------------|-------------|
| SCP2      | -1.32679455  | 0.001891731 | 0.025351442 |
| AKR1CL1   | -2.258267605 | 0.000495443 | 0.013990274 |
| GALE      | -1.194089811 | 0.000337768 | 0.012254849 |
| TCP1      | -1.741678583 | 0.002008986 | 0.026170303 |
| SLCO1B7   | -2.599059991 | 0.003568704 | 0.035575517 |
| ACSM2A    | -3.824937615 | 0.000339529 | 0.012254849 |
| C10orf114 | -2.406452336 | 0.000622201 | 0.015171623 |
| CYP4A22   | -3.209683762 | 0.000278464 | 0.012003271 |
| AFMID     | -1.80223949  | 0.001765794 | 0.024474169 |
| AR        | -2.302979192 | 0.001034426 | 0.018646769 |
| PLIN5     | -2.793212609 | 0.001079983 | 0.01901645  |
| STAP2     | -1.886407186 | 0.001890343 | 0.025351442 |
| CFH       | -2.122540929 | 0.001372672 | 0.021441826 |
| FOLH1     | -2.934073933 | 9.75E-05    | 0.008856782 |
| PAPSS2    | -1.401153859 | 0.002767273 | 0.030688023 |
| DNAJC25   | -1.70135901  | 0.002597796 | 0.029612849 |
| ARID3C    | -1.515525358 | 0.002286074 | 0.027739133 |
| C4BPB     | -2.693542569 | 0.001821644 | 0.024843478 |
| MSMO1     | -2.168143359 | 0.000311327 | 0.012234335 |
| ZBTB16    | -2.031486835 | 1.23E-05    | 0.004370993 |
| PCK2      | -2.530783108 | 0.000350918 | 0.012360149 |
| GCH1      | -1.25547639  | 0.001455592 | 0.022127597 |
| GPHN      | -1.479395092 | 0.005293218 | 0.04521604  |
| ASPDH     | -2.348602895 | 0.000215434 | 0.011335849 |
| ASL       | -1.520708031 | 0.001475235 | 0.022309928 |
| SC5DL     | -1.801574519 | 0.000533275 | 0.014363257 |
| CES1      | -1.522723045 | 0.004900716 | 0.042941209 |
| ANKRD56   | -2.736905771 | 0.000264633 | 0.011874189 |
| ALDH3A2   | -1.208575783 | 0.004693004 | 0.041868904 |
| LONRF3    | -1.407855497 | 0.005001739 | 0.04354606  |
| SERPING1  | -1.57467584  | 0.002469108 | 0.028904426 |
| PBLD      | -2.040039168 | 0.004342599 | 0.040122117 |
| SAR1B     | -1.121662642 | 0.005498208 | 0.046396503 |
| FAM134B   | -1.380503857 | 0.000958915 | 0.018127049 |
| SDHC      | -1.181162404 | 0.001784736 | 0.024603081 |
| PALM2     | -1.697290906 | 0.001133748 | 0.019288835 |
| PHYH      | -2.10918899  | 0.000688426 | 0.015989647 |
| HSD17B10  | -1.262741108 | 0.001606822 | 0.023200054 |
| TTPAL     | -1.703547869 | 5.40E-07    | 0.001836216 |
| GPER      | -1.416119952 | 0.000106658 | 0.009156966 |
| PC        | -2.829615415 | 0.001585356 | 0.02305315  |
| NUPR1     | -1.009955747 | 0.001883719 | 0.025334653 |
| NET1      | -1.610494124 | 0.002253337 | 0.027563891 |
| TUBB2A    | -1.828432805 | 0.005090683 | 0.044057391 |

|           |              |             |             |
|-----------|--------------|-------------|-------------|
| UGT2B11   | -2.302572672 | 0.003350957 | 0.034238845 |
| UGT2B7    | -2.431116642 | 0.000384299 | 0.012777971 |
| UGT2B10   | -2.6395693   | 0.000417562 | 0.013005203 |
| UGT2B15   | -3.383685544 | 0.000605344 | 0.015107025 |
| CDC14B    | -1.42671472  | 0.003995353 | 0.038399232 |
| MYH14     | -1.429599819 | 0.005366804 | 0.045634597 |
| PDE11A    | -1.275739866 | 0.002575607 | 0.029524757 |
| DEPDC7    | -2.934716659 | 0.001641783 | 0.023472434 |
| NR1I3     | -3.315344482 | 0.000415899 | 0.013005203 |
| NR1I3     | -3.4071619   | 0.000390707 | 0.012854122 |
| NR1I3     | -3.473146545 | 0.00028896  | 0.012095493 |
| NR1I3     | -1.678017878 | 0.001984287 | 0.026002052 |
| NR1I3     | -3.245742008 | 0.000985788 | 0.018413405 |
| NR1I3     | -3.508182119 | 0.000646625 | 0.015431998 |
| NR1I3     | -3.476931523 | 0.00063393  | 0.015298251 |
| NR1I3     | -3.324643174 | 0.000739205 | 0.016396702 |
| EXOC3L4   | -1.470009171 | 0.000142612 | 0.009971142 |
| RGPD2     | -2.149585725 | 0.003057432 | 0.032646723 |
| SLC29A1   | -1.249002838 | 0.00017676  | 0.010584994 |
| SLC29A1   | -1.417423461 | 0.001053181 | 0.018828145 |
| PAICS     | -1.024249901 | 0.003601969 | 0.035740345 |
| DBI       | -1.202207835 | 0.000791468 | 0.016692777 |
| ALDH5A1   | -2.174785323 | 0.000211467 | 0.011243021 |
| TTC36     | -1.488182933 | 0.002851817 | 0.03125108  |
| SERPINA11 | -3.103617339 | 0.004394183 | 0.040372727 |
| ASPG      | -1.24577963  | 0.000229702 | 0.011445469 |
| ONECUT3   | -1.880541951 | 0.001543836 | 0.022773745 |
| CPN2      | -3.559294259 | 0.000600082 | 0.015063312 |
| CCDC150   | -1.824176377 | 0.003820375 | 0.037252611 |
| CYP4F2    | -3.647411612 | 0.000292338 | 0.012095493 |
| SCARB1    | -1.435432649 | 0.003194748 | 0.033454343 |
| ZGPAT     | -1.742120299 | 0.000475333 | 0.013629768 |
| DDT       | -1.657246925 | 0.003136    | 0.033124526 |
| C2orf54   | -2.256148519 | 0.002203984 | 0.027254108 |
| AADAC     | -3.490924064 | 0.00141671  | 0.021775325 |
| ANG       | -1.902109131 | 0.002470584 | 0.028905126 |
| GJB1      | -2.97708483  | 0.000983074 | 0.018401912 |
| HMGCS1    | -1.684500778 | 6.94E-05    | 0.008226635 |
| C10orf125 | -1.346392418 | 0.000366671 | 0.01259222  |
| SLC17A3   | -2.713092648 | 0.003151833 | 0.033220352 |
| COQ10A    | -1.002276748 | 0.003823866 | 0.037263982 |
| CLEC1B    | -2.028616788 | 0.000878758 | 0.017658338 |
| NPW       | -1.662779869 | 0.002186853 | 0.027219455 |
| HOOK2     | -1.174986812 | 0.000245888 | 0.01169459  |

|           |              |             |             |
|-----------|--------------|-------------|-------------|
| TMEM192   | -1.075049237 | 0.001479962 | 0.022344068 |
| SERPINA10 | -2.148809932 | 0.001045424 | 0.018754179 |
| 10-Mar    | -1.037828052 | 0.006201824 | 0.049868622 |
| NPC1L1    | -3.123668937 | 4.06E-05    | 0.007183485 |
| KNG1      | -3.21649399  | 0.000666616 | 0.015697374 |
| ADH6      | -3.402846071 | 0.000163901 | 0.010424332 |
| C4orf19   | -1.952355215 | 0.000778226 | 0.016576452 |
| FGGY      | -1.864501825 | 0.004094886 | 0.038794056 |
| ASPDH     | -1.94893058  | 0.000335267 | 0.012254849 |
| C6        | -3.681676592 | 0.000414167 | 0.013005203 |
| CPS1      | -2.699550458 | 0.001511667 | 0.022576581 |
| CPS1      | -2.066823468 | 0.003412647 | 0.034573951 |
| ADK       | -1.889393611 | 4.46E-05    | 0.007487582 |
| FOXD4L5   | -1.052863995 | 0.001124934 | 0.019278478 |
| ODZ2      | -1.044440627 | 0.00511717  | 0.044230376 |
| RGPD6     | -1.732091324 | 0.006127007 | 0.049481396 |
| ABAT      | -2.958695763 | 8.70E-05    | 0.00872223  |
| BAAT      | -2.652712688 | 0.000768769 | 0.016486247 |
| GALE      | -1.036297933 | 9.28E-05    | 0.008734636 |
| SLC6A12   | -2.78630168  | 0.000484709 | 0.013790312 |
| PRG4      | -2.985525507 | 0.000676671 | 0.015860984 |
| CLCN5     | -1.257964942 | 0.001682339 | 0.023755519 |
| SLC6A12   | -2.016941002 | 8.47E-05    | 0.00872223  |
| CYP2C18   | -3.199020948 | 0.001079452 | 0.01901645  |
| CYP4F11   | -1.714425774 | 0.005599363 | 0.046774385 |
| GBA3      | -2.782819541 | 0.000218725 | 0.011351772 |
| CRYZ      | -1.221536667 | 0.002339789 | 0.028033532 |
| MYO1B     | -1.889822256 | 0.00492481  | 0.043059922 |
| SLC39A14  | -2.258974863 | 0.000999377 | 0.018471549 |
| GNE       | -2.40676967  | 0.000146084 | 0.010072696 |
| HOGA1     | -2.68601872  | 0.002534249 | 0.029295628 |
| SARDH     | -3.094788092 | 0.000343962 | 0.012360149 |
| SIGIRR    | -1.221447297 | 0.001328248 | 0.02100504  |
| SIGIRR    | -1.11129534  | 0.0010101   | 0.018505755 |
| SH3D19    | -1.24790756  | 0.003407153 | 0.034565756 |
| CRYZ      | -1.620177195 | 0.0054144   | 0.045962745 |
| SLC39A8   | -1.002302757 | 0.001640782 | 0.023472434 |
| SLC39A14  | -2.46140955  | 0.001392797 | 0.021623837 |
| ELFN1     | -2.423263833 | 4.31E-05    | 0.007335659 |
| SLC39A5   | -3.069733406 | 0.000151374 | 0.01013002  |
| IGSF9     | -1.37507789  | 0.000422404 | 0.013045227 |
| ACBD4     | -1.286309283 | 0.001039465 | 0.018681087 |
| AFM       | -2.888159953 | 0.000316383 | 0.012254849 |
| POSTN     | -2.525082791 | 2.79E-05    | 0.006427112 |

|          |              |             |             |
|----------|--------------|-------------|-------------|
| DHRS1    | -1.529553615 | 0.000120741 | 0.009554452 |
| HSD17B13 | -3.63155827  | 0.000535506 | 0.0143951   |
| LRP5L    | -1.001089844 | 0.001532803 | 0.022715011 |
| AKR1C2   | -2.349801897 | 0.005807068 | 0.047869821 |
| GPT2     | -2.601898559 | 0.002242402 | 0.027479514 |
| SLC38A4  | -3.064858067 | 0.000473747 | 0.013629768 |
| POSTN    | -1.574750711 | 0.002115689 | 0.026828519 |
| UNC93A   | -1.808088531 | 0.004212137 | 0.039431204 |
| CES5A    | -2.481655369 | 0.000170866 | 0.010584994 |
| NHSL1    | -1.733054857 | 0.001136035 | 0.019311653 |
| ANPEP    | -2.811258404 | 0.000175388 | 0.010584994 |
| AOX1     | -3.250077238 | 0.000506135 | 0.014054629 |
| AZGP1    | -2.318799049 | 0.00274767  | 0.030520361 |
| GGCX     | -2.270665999 | 0.000990595 | 0.018468674 |
| TMEM25   | -1.240788559 | 0.002573706 | 0.029521318 |
| FMO5     | -3.352795826 | 0.000808475 | 0.01694644  |
| ANG      | -2.671519489 | 0.001278951 | 0.020587681 |
| PRAP1    | -2.759371014 | 0.001023116 | 0.018570027 |
| CLDN3    | -1.033447608 | 0.004464431 | 0.040826872 |
| CPN1     | -2.390236722 | 0.003290154 | 0.033942283 |
| HSD3B7   | -1.15357396  | 0.000646805 | 0.015431998 |
| FMO5     | -2.644462487 | 0.001555542 | 0.022822466 |
| ALKBH2   | -1.090746002 | 0.005855995 | 0.048111064 |
| C2orf72  | -2.975612198 | 0.001009071 | 0.018505755 |
| PALM3    | -2.119873519 | 0.000525602 | 0.014288541 |
| SLC13A5  | -2.560598627 | 0.000258353 | 0.011721179 |
| RASSF7   | -1.305720664 | 0.004179801 | 0.039304317 |
| PLEKHG6  | -1.203671658 | 0.004573551 | 0.041391236 |
| FGFR2    | -2.332171666 | 0.003578436 | 0.035645009 |
| OGDHL    | -2.922851662 | 0.001555453 | 0.022822466 |
| SCG5     | -1.977252474 | 0.000781081 | 0.016576452 |
| UGT2B10  | -3.431691322 | 8.89E-05    | 0.00872223  |
| FGFR2    | -2.013029765 | 0.004377668 | 0.040240641 |
| ENTPD5   | -2.437964535 | 0.00208578  | 0.026597929 |
| AFMID    | -2.347785295 | 0.00101158  | 0.018505755 |
| LSS      | -1.53636055  | 0.003346536 | 0.034238845 |
| AKR1C1   | -2.615212699 | 0.001654937 | 0.023610904 |
| DDT      | -1.890423845 | 0.002710048 | 0.030291976 |
| DECR1    | -1.208796666 | 0.003624397 | 0.03583195  |
| FABP1    | -2.026467086 | 0.00589395  | 0.048306259 |
| FMO5     | -2.898270955 | 0.001608498 | 0.023207834 |
| ASGR2    | -2.658588538 | 0.002070338 | 0.026507793 |
| GATM     | -2.068864912 | 0.000366287 | 0.01259222  |
| CXADR    | -1.430858535 | 0.004480849 | 0.040876238 |

|        |              |             |             |
|--------|--------------|-------------|-------------|
| AKR1C2 | -2.915083822 | 0.002701901 | 0.030242329 |
| HGFAC  | -2.276376117 | 0.003312822 | 0.034072833 |
| DPYS   | -2.902580129 | 0.000297301 | 0.012102504 |
| GPLD1  | -3.208692164 | 0.000204013 | 0.011049475 |
| GSTZ1  | -1.330044377 | 0.001037671 | 0.018665282 |
| ECM2   | -2.255453024 | 0.000127069 | 0.009595296 |
| ACADL  | -2.517502561 | 0.000284351 | 0.012019591 |
| AHSG   | -1.958735617 | 0.003281882 | 0.033897042 |
| ALCAM  | -1.826391334 | 0.003591425 | 0.035662712 |
| APOF   | -3.032673867 | 0.003226174 | 0.033645663 |
| CPS1   | -2.718178117 | 0.000967362 | 0.01823606  |
| ARSD   | -1.136845284 | 0.004962947 | 0.043263672 |
| APCS   | -2.768598159 | 0.000612096 | 0.015131243 |
| ASGR1  | -2.813011153 | 0.002287668 | 0.027739133 |
| BHMT   | -3.472656971 | 0.000337722 | 0.012254849 |
| ACADSB | -2.700738214 | 0.000290747 | 0.012095493 |
| AMBP   | -1.16598157  | 0.003626019 | 0.03583195  |
| MASP1  | -2.319590045 | 0.004006189 | 0.038399232 |
| APOC4  | -2.422652712 | 0.000373726 | 0.012603013 |
| C9     | -2.924626271 | 0.004162022 | 0.039193655 |
| EGR1   | -1.758416264 | 0.001989989 | 0.026043337 |
| EPHX2  | -2.418975286 | 0.00139744  | 0.021636005 |
| C5     | -3.018928107 | 0.000844322 | 0.017306885 |
| CDO1   | -2.052485204 | 0.001126013 | 0.019278478 |
| DSG1   | -1.753637895 | 0.002072978 | 0.026507793 |
| FN1    | -1.184594634 | 0.002885541 | 0.031537042 |
| GOT2   | -1.81057616  | 0.000257392 | 0.011720495 |
| HPD    | -2.230365549 | 0.001708447 | 0.023922942 |
| BAAT   | -3.012103578 | 0.001141013 | 0.019364032 |
| CYB5A  | -1.490162438 | 0.001161122 | 0.019546423 |
| EHHADH | -2.671122368 | 0.001006584 | 0.018505755 |
| ACSL1  | -1.817583556 | 0.002365553 | 0.028176851 |
| FMO4   | -1.259597181 | 0.002205521 | 0.027256614 |
| AKR1C4 | -2.995886108 | 0.000818175 | 0.017057636 |
| CFB    | -1.55727827  | 0.000945486 | 0.018068448 |
| CA5A   | -2.261821865 | 0.003517457 | 0.035306003 |
| CRYM   | -1.811153215 | 0.005647859 | 0.047073987 |
| ECI1   | -1.327088485 | 0.002353866 | 0.028136142 |
| CRYZ   | -1.871238328 | 0.002397906 | 0.02836989  |
| CTPS   | -1.664243345 | 0.000890427 | 0.01771828  |
| CFHR1  | -2.548630201 | 0.001278496 | 0.020587681 |
| CPB2   | -3.29056507  | 0.000418116 | 0.013005203 |
| ENO3   | -2.559244886 | 2.37E-05    | 0.006193459 |
| GATA4  | -2.307189385 | 0.001385296 | 0.021556556 |

|          |              |             |             |
|----------|--------------|-------------|-------------|
| IVD      | -1.1744521   | 0.00311111  | 0.032944201 |
| ETFB     | -1.675744724 | 0.000471353 | 0.013629768 |
| HSD17B2  | -2.817206827 | 0.003470168 | 0.034934394 |
| INHBA    | -1.678396297 | 0.000934366 | 0.01793028  |
| LECT2    | -3.072119945 | 0.000149631 | 0.010125656 |
| ID1      | -1.732413247 | 0.000243002 | 0.011672752 |
| HMGCS1   | -1.708477186 | 0.001210465 | 0.020026719 |
| HLF      | -1.223972278 | 0.006169061 | 0.049742316 |
| OCLN     | -2.280964314 | 0.000844959 | 0.017306885 |
| ITIH4    | -2.709261023 | 0.001435752 | 0.021911473 |
| KCNJ6    | -1.249277752 | 9.48E-05    | 0.008797851 |
| HSPE1    | -1.048969904 | 0.002480969 | 0.028993393 |
| NTHL1    | -1.57096468  | 0.00298866  | 0.032230901 |
| ITGA5    | -1.278836228 | 0.00088709  | 0.01771828  |
| PLGLB2   | -2.256336338 | 0.002761501 | 0.03064066  |
| ITIH2    | -2.828787391 | 0.000743457 | 0.016426854 |
| PER1     | -1.394945182 | 0.001420414 | 0.021775935 |
| PPL      | -1.987897229 | 2.44E-05    | 0.006193459 |
| FURIN    | -1.492209049 | 0.000855371 | 0.017351477 |
| PCK1     | -1.440034704 | 0.002314473 | 0.027876304 |
| SERPINF1 | -2.108878251 | 0.000170776 | 0.010584994 |
| PGM1     | -1.968641061 | 0.000954096 | 0.018086189 |
| PRG2     | -1.70083006  | 0.005540391 | 0.046571575 |
| PFKFB1   | -2.355448419 | 0.000231166 | 0.011475579 |
| PLS1     | -2.357183122 | 0.00182506  | 0.024857388 |
| PROX1    | -1.079000066 | 0.006106425 | 0.049412907 |
| PTPRF    | -1.976924271 | 0.002550732 | 0.02942133  |
| PCYT2    | -1.988345297 | 0.00114696  | 0.019448002 |
| PRPSAP1  | -1.278920576 | 0.000975404 | 0.018320015 |
| MAPK13   | -1.039934722 | 0.001332831 | 0.021029389 |
| PEBP1    | -1.110062451 | 0.001485205 | 0.022362968 |
| PCDH1    | -2.066391762 | 0.005978589 | 0.04878452  |
| RDH5     | -1.253697237 | 0.005581463 | 0.046723725 |
| SDC1     | -2.447862455 | 0.002172006 | 0.027171364 |
| SDC4     | -1.494677832 | 0.00078767  | 0.016664319 |
| PTPRD    | -1.418723868 | 0.001795437 | 0.02460588  |
| PLIN1    | -2.716914647 | 5.01E-05    | 0.007805712 |
| SLC22A1  | -2.783450668 | 0.000222971 | 0.011408959 |
| TFR2     | -1.990843458 | 0.001200987 | 0.020015789 |
| CX3CL1   | -1.056481171 | 0.001534921 | 0.022715011 |
| RARRES2  | -1.342362733 | 0.003531853 | 0.035364733 |
| SLC6A1   | -2.771309297 | 0.000911289 | 0.017877478 |
| SCP2     | -1.584072432 | 0.00167827  | 0.023744664 |
| SORD     | -1.980283767 | 0.000137598 | 0.00984617  |

|          |              |             |             |
|----------|--------------|-------------|-------------|
| SLC6A12  | -2.557903845 | 0.000412473 | 0.013005203 |
| TM7SF2   | -1.682390626 | 0.000780558 | 0.016576452 |
| UGDH     | -1.719733795 | 0.000721721 | 0.016245481 |
| SLPI     | -1.290633143 | 0.002569057 | 0.029499358 |
| TCEA3    | -2.113423379 | 0.000765952 | 0.016486247 |
| TPSAB1   | -1.077214808 | 0.002091507 | 0.026654314 |
| TST      | -1.897717472 | 0.001661346 | 0.023669247 |
| THOP1    | -1.6071498   | 0.004873869 | 0.042890043 |
| UAP1     | -1.787080513 | 0.001091625 | 0.019064259 |
| SQLE     | -1.247442215 | 0.001024189 | 0.018570027 |
| VSNL1    | -1.895714765 | 0.000856695 | 0.017351477 |
| TSPAN6   | -1.482923247 | 0.001268739 | 0.020501658 |
| ACOX2    | -1.724639937 | 0.000589439 | 0.014967647 |
| SLC10A1  | -3.080763335 | 0.001247528 | 0.020340824 |
| THRSP    | -3.910753624 | 1.04E-05    | 0.004370993 |
| SPR      | -1.733018226 | 0.002125094 | 0.02692428  |
| TPD52L1  | -1.946657907 | 0.001402175 | 0.021670549 |
| FCN3     | -1.616644276 | 0.003907981 | 0.037847012 |
| WEE1     | -1.339649044 | 0.001896126 | 0.025366557 |
| HSD17B6  | -1.206473946 | 0.00367416  | 0.036080643 |
| NIPSNAP1 | -1.636919182 | 0.000602134 | 0.015063312 |
| ANXA9    | -1.434762831 | 0.000310667 | 0.012234335 |
| ZKSCAN1  | -1.319856918 | 0.000324097 | 0.012254849 |
| ALDH4A1  | -2.555659078 | 0.000111053 | 0.009156966 |
| KMO      | -1.509945823 | 0.002007178 | 0.026167651 |
| GPAA1    | -1.119080731 | 0.002795401 | 0.030880359 |
| GGH      | -2.357132329 | 0.001242704 | 0.020340824 |
| AKR1C3   | -3.173764228 | 0.001046288 | 0.018754179 |
| NR5A2    | -3.012125274 | 0.002691158 | 0.03023813  |
| ABCC3    | -1.487860949 | 0.005567016 | 0.0466569   |
| PEX11A   | -1.700488461 | 0.000997864 | 0.018471549 |
| KCNK5    | -1.079569408 | 0.004846082 | 0.042719177 |
| CHRD     | -1.99544268  | 0.000953894 | 0.018086189 |
| NR1I2    | -3.478301483 | 0.000183011 | 0.010584994 |
| SELENBP1 | -1.363774635 | 0.000292516 | 0.012095493 |
| SLC27A2  | -3.373509788 | 0.002138592 | 0.026995504 |
| KYNU     | -1.722014527 | 0.00456121  | 0.041313962 |
| ABCB11   | -2.554812739 | 0.005730013 | 0.04751582  |
| GYG2     | -2.680474956 | 0.000333738 | 0.012254849 |
| ACOX1    | -2.414596837 | 0.001100829 | 0.019128638 |
| SLC1A2   | -2.811416273 | 0.004979952 | 0.043393388 |
| GJB2     | -3.137759817 | 0.001084053 | 0.01901645  |
| GDA      | -2.4958229   | 0.000789927 | 0.016692777 |
| STBD1    | -2.595543389 | 0.003564163 | 0.035547611 |

|          |              |             |             |
|----------|--------------|-------------|-------------|
| ECHS1    | -1.921329487 | 0.00014135  | 0.009971142 |
| SYT7     | -2.610553221 | 0.000124531 | 0.009595296 |
| ACVR1B   | -1.022970664 | 0.005107582 | 0.044166199 |
| SHMT1    | -1.511669037 | 0.001921276 | 0.025536956 |
| SLC28A1  | -2.374921636 | 4.16E-07    | 0.001836216 |
| CTNNA2   | -1.317864987 | 0.000809639 | 0.016951958 |
| BBOX1    | -3.543488696 | 3.15E-06    | 0.00313707  |
| HABP2    | -3.28304873  | 0.000395799 | 0.012854122 |
| FASN     | -1.888218128 | 0.000320906 | 0.012254849 |
| FADS2    | -2.057904545 | 0.000255196 | 0.01169459  |
| FCN2     | -1.534807761 | 0.002313564 | 0.027876304 |
| LBP      | -3.11557343  | 0.004363564 | 0.040177712 |
| HSD17B10 | -1.168701203 | 0.0046132   | 0.041549015 |
| ONECUT1  | -2.349184713 | 0.002154761 | 0.027112966 |
| CEBPA    | -1.591396575 | 0.000528139 | 0.014292776 |
| RCAN1    | -1.592373073 | 0.002044989 | 0.026341005 |
| DSP      | -1.59002851  | 0.005523981 | 0.046487057 |
| PCK2     | -2.021903064 | 0.001093468 | 0.019064259 |
| MTMR4    | -1.526679302 | 0.000451284 | 0.013391597 |
| REPS2    | -1.007076062 | 0.004410256 | 0.040430979 |
| PKP2     | -2.189005212 | 0.001942908 | 0.025665926 |
| FOXA3    | -2.156493933 | 0.000131562 | 0.00971712  |
| LRAT     | -1.600882081 | 0.002909699 | 0.031648593 |
| FOXA1    | -3.100892545 | 0.000706139 | 0.016099625 |
| NTN1     | -1.716726689 | 0.000227525 | 0.011445469 |
| CDH1     | -1.605201112 | 0.004136026 | 0.039033531 |
| CYP8B1   | -2.842933685 | 0.00324407  | 0.033774058 |
| RGN      | -1.593970268 | 0.001171796 | 0.019657675 |
| KCNB1    | -1.181947185 | 0.002787771 | 0.030831602 |
| TCP10    | -2.031339758 | 0.000758453 | 0.016486247 |
| TM4SF4   | -3.112524456 | 0.002701434 | 0.030242329 |
| VIPR1    | -1.641817257 | 0.000553881 | 0.014663262 |
| FOLH1    | -2.562590385 | 0.000182237 | 0.010584994 |
| NRTN     | -1.006540455 | 0.002005055 | 0.026156684 |
| FXYD1    | -2.488887573 | 4.58E-05    | 0.007487582 |
| RELN     | -2.756555698 | 0.000101357 | 0.008967806 |
| HOMER2   | -1.952942065 | 0.000155428 | 0.010188496 |
| XYLB     | -1.986337989 | 0.001588103 | 0.023076663 |
| NR2F6    | -1.577784536 | 0.000201973 | 0.011049475 |
| FGB      | -2.497008026 | 0.002262874 | 0.027647421 |
| GPD1     | -2.363563489 | 0.00152018  | 0.022654017 |
| SLC17A1  | -2.075669855 | 0.000598461 | 0.015063312 |
| HP       | -1.223527958 | 0.002362287 | 0.028170825 |
| NR1I3    | -3.091706371 | 0.000414055 | 0.013005203 |

|         |              |             |             |
|---------|--------------|-------------|-------------|
| GLUD1   | -1.868152842 | 9.68E-05    | 0.008856782 |
| IGFALS  | -1.807056479 | 1.36E-05    | 0.004539536 |
| GRB7    | -1.639147406 | 0.000717644 | 0.016240629 |
| GCHFR   | -2.249288385 | 0.000822924 | 0.017073994 |
| PPP1R3C | -1.716424518 | 0.002438166 | 0.028657221 |
| NR1H4   | -2.73179791  | 0.000927422 | 0.017880184 |
| EGFR    | -2.273288167 | 0.00081308  | 0.016990633 |
| RORC    | -2.938774291 | 0.000198253 | 0.011049198 |
| SLC15A1 | -2.989917818 | 0.001161335 | 0.019546423 |
| SCARB1  | -1.3311602   | 0.002973026 | 0.032097987 |
| HMGCS2  | -2.224098156 | 0.00340891  | 0.034565756 |
| DEFB1   | -2.316700914 | 0.000797228 | 0.016779595 |
| COX6A2  | -1.06349523  | 0.002823019 | 0.031069951 |
| LPA     | -3.115770355 | 0.001133504 | 0.019288835 |
| ABCB6   | -1.469129963 | 0.001928158 | 0.0255951   |
| TOM1L1  | -1.986842932 | 0.000189476 | 0.0107454   |
| SHMT2   | -1.147091989 | 0.003347664 | 0.034238845 |
| SULT1E1 | -2.422336715 | 0.000172553 | 0.010584994 |
| ALDH6A1 | -2.140853669 | 0.000385097 | 0.012777971 |
| RCL1    | -2.089477944 | 0.001797154 | 0.024608118 |
| GPA33   | -1.201869797 | 0.004684858 | 0.041866243 |
| GNE     | -1.760591393 | 0.000146752 | 0.010072696 |
| INHBC   | -3.061463074 | 0.001745159 | 0.024320249 |
| GLYAT   | -3.425651181 | 0.000183908 | 0.010584994 |
| TDO2    | -3.299958126 | 0.00110152  | 0.019128638 |
| ACSM3   | -1.725859524 | 0.00098337  | 0.018401912 |
| SMO     | -1.723664869 | 6.25E-05    | 0.008053145 |
| CFHR2   | -3.80314201  | 0.000601763 | 0.015063312 |
| NET1    | -1.528720495 | 0.000424266 | 0.013045227 |
| SLC17A2 | -1.952522965 | 0.000318651 | 0.012254849 |
| TBL1X   | -1.10180444  | 0.005817027 | 0.047906583 |
| HRSP12  | -2.599211738 | 0.002758089 | 0.030619436 |
| SLC23A1 | -2.450441006 | 0.000181925 | 0.010584994 |
| TOB1    | -1.662531321 | 0.001989458 | 0.026043337 |
| IDH1    | -1.089951701 | 0.002440234 | 0.028665031 |
| MT1H    | -3.06483573  | 0.000270818 | 0.011960837 |
| LIPG    | -2.172456504 | 0.005232973 | 0.044929553 |
| MT2A    | -1.476311748 | 0.002169286 | 0.027171364 |
| MTHFD1  | -1.621740098 | 0.005552952 | 0.046619426 |
| ST3GAL6 | -1.866823032 | 0.000273008 | 0.011960837 |
| NRAP    | -2.693770132 | 0.000765083 | 0.016486247 |
| MT1F    | -2.266628465 | 4.02E-05    | 0.007183485 |
| MT1A    | -2.478032894 | 0.000209329 | 0.011187576 |
| TFPI    | -1.262712497 | 0.003025059 | 0.032488295 |

|          |              |             |             |
|----------|--------------|-------------|-------------|
| ECI2     | -1.092827823 | 0.003927747 | 0.037950251 |
| ACAA2    | -1.978939971 | 0.003202909 | 0.033516452 |
| ZBTB16   | -1.744511711 | 1.81E-05    | 0.005345652 |
| AGFG2    | -1.002837726 | 0.002882249 | 0.031517941 |
| SERPINA4 | -1.742466866 | 2.27E-05    | 0.006099526 |
| PGRMC2   | -1.021623627 | 0.000445745 | 0.01332889  |
| FST      | -3.079812152 | 0.001538364 | 0.02272594  |
| MTHFS    | -2.221195719 | 0.000510305 | 0.014117067 |
| PHYH     | -2.231741204 | 0.000193875 | 0.010934129 |
| IQGAP2   | -1.430365145 | 0.000748123 | 0.01645871  |
| SAA4     | -2.534697334 | 0.001018151 | 0.018559436 |
| MSMO1    | -2.593450617 | 0.000332388 | 0.012254849 |
| AVIL     | -1.432526953 | 0.001917599 | 0.025504697 |
| SLC20A2  | -1.164000359 | 0.002490263 | 0.029052114 |
| MARCO    | -1.808178894 | 0.003306666 | 0.034045019 |
| SLC16A2  | -2.623821843 | 0.000956711 | 0.018117246 |
| PPP1R1A  | -1.063994941 | 0.002725429 | 0.030422285 |
| SLCO1B1  | -3.524040668 | 0.000417038 | 0.013005203 |
| ILVBL    | -1.422265355 | 0.00139102  | 0.021612679 |
| COLEC10  | -2.54727926  | 0.003603412 | 0.035740345 |
| POSTN    | -2.539006214 | 3.64E-05    | 0.007011546 |
| RBP4     | -2.058042639 | 0.003439585 | 0.034729259 |
| MASP2    | -2.264654446 | 0.002590941 | 0.029584257 |
| SLC17A3  | -2.709036963 | 0.004225981 | 0.039504411 |
| FTCD     | -3.187492543 | 0.000122095 | 0.009595296 |
| STARD10  | -2.14704201  | 0.000562088 | 0.014710456 |
| UGP2     | -1.461173188 | 0.001912587 | 0.025475861 |
| SPP2     | -2.759028374 | 0.001984222 | 0.026002052 |
| SLC38A3  | -1.340311019 | 0.000512    | 0.014125672 |
| FMO3     | -3.383527293 | 0.000586652 | 0.014934015 |
| SDS      | -2.876380949 | 0.000297064 | 0.012102504 |
| SLC19A2  | -1.998677657 | 0.001523777 | 0.02265869  |
| ANXA10   | -3.330997818 | 0.001217139 | 0.02010411  |
| PTGR1    | -2.678197908 | 0.001253023 | 0.020398568 |
| SARDH    | -1.760806585 | 0.002283522 | 0.027739133 |
| PKP3     | -1.142353892 | 0.003687717 | 0.036147402 |
| DLEC1    | -1.464510912 | 0.003661206 | 0.03607489  |
| TREH     | -1.766230452 | 0.001521914 | 0.02265869  |
| MME      | -1.61516519  | 0.003712484 | 0.036352071 |
| AKR7A3   | -2.951656361 | 0.000357749 | 0.012421423 |
| ALDH1L1  | -3.699080393 | 7.22E-05    | 0.008374085 |
| PEMT     | -2.203782055 | 0.001003185 | 0.018484678 |
| GLUD2    | -1.965225103 | 0.000178359 | 0.010584994 |
| ACOX1    | -2.088565194 | 0.002239522 | 0.027460704 |

|          |              |             |             |
|----------|--------------|-------------|-------------|
| GRHPR    | -1.51130226  | 0.004882428 | 0.042898746 |
| MME      | -2.189284955 | 3.23E-06    | 0.00313707  |
| ATF5     | -1.668700713 | 0.001537802 | 0.02272594  |
| SLC25A10 | -1.372668466 | 0.001218103 | 0.02010411  |
| EPB41L1  | -1.470625718 | 0.003025091 | 0.032488295 |
| SLC27A5  | -2.471096365 | 0.000271324 | 0.011960837 |
| TPSG1    | -3.613013952 | 1.53E-07    | 0.001562193 |
| FBXO2    | -1.414505937 | 0.004637705 | 0.041692376 |
| HAAO     | -2.151089401 | 0.000253972 | 0.01169459  |
| DMGDH    | -2.283919182 | 0.000499909 | 0.014019431 |
| NPC1L1   | -1.549992061 | 0.003079412 | 0.03279566  |
| SEC14L2  | -2.843993218 | 0.000322366 | 0.012254849 |
| TMEM176B | -2.176346963 | 0.000848255 | 0.01731797  |
| MACROD1  | -1.494734723 | 0.00099666  | 0.018471549 |
| SHPK     | -1.130357205 | 0.002502785 | 0.029110756 |
| DNMT3L   | -3.171397605 | 1.99E-06    | 0.002389087 |
| C11orf54 | -1.691722518 | 0.000970387 | 0.018242554 |
| CLDN15   | -1.545004641 | 0.004233765 | 0.039542414 |
| FST      | -3.323766742 | 0.000587522 | 0.014937546 |
| KLF15    | -2.093699721 | 0.005041287 | 0.04381563  |
| SLC7A9   | -1.991097389 | 0.002273988 | 0.027705534 |
| TJP3     | -1.858861142 | 0.001706521 | 0.023922942 |
| GREM1    | -1.231926895 | 0.005499585 | 0.046396503 |
| SLC25A15 | -3.16317934  | 0.000474776 | 0.013629768 |
| MTCH2    | -1.10628828  | 0.002170214 | 0.027171364 |
| GCAT     | -2.044810082 | 0.001763452 | 0.02446351  |
| FAM162A  | -1.234236257 | 0.000546571 | 0.014529686 |
| A1CF     | -2.823877195 | 0.000591568 | 0.014990032 |
| ANGPTL3  | -2.793416073 | 0.003468286 | 0.034932668 |
| AMACR    | -2.086804134 | 0.000270137 | 0.011960837 |
| MDN1     | -1.39175278  | 0.001904433 | 0.025399147 |
| MTFR1    | -1.230257929 | 0.003839275 | 0.037338644 |
| RHOD     | -2.16642814  | 0.000907084 | 0.017877478 |
| CARD10   | -1.308875734 | 0.000332067 | 0.012254849 |
| COBLL1   | -1.884904217 | 0.001749148 | 0.02434261  |
| SLITRK3  | -3.388725968 | 3.93E-06    | 0.003192872 |
| JAKMIP2  | -1.311999641 | 0.00326631  | 0.033866032 |
| KIAA0664 | -1.084934317 | 0.004506266 | 0.041034755 |
| SLC35D1  | -1.962945966 | 0.002105837 | 0.026770096 |
| KIAA0564 | -1.30252546  | 0.002961614 | 0.032008639 |
| SLC39A14 | -1.992388132 | 0.001082302 | 0.01901645  |
| CUX2     | -2.937949819 | 0.000214797 | 0.011335849 |
| RPGRIP1L | -1.65453554  | 0.005784856 | 0.0477545   |
| MMACHC   | -1.727588996 | 0.004061053 | 0.038603569 |

|           |              |             |             |
|-----------|--------------|-------------|-------------|
| DAK       | -2.540773196 | 0.000142262 | 0.009971142 |
| AUTS2     | -1.211052406 | 0.004802969 | 0.042449101 |
| GET4      | -1.200902446 | 0.000636582 | 0.015326002 |
| PAMR1     | -1.151276845 | 0.003840672 | 0.037338644 |
| PVRL3     | -1.311518644 | 0.002316045 | 0.027876304 |
| ARHGEF26  | -1.80094313  | 0.001257627 | 0.02042618  |
| ISOC1     | -1.408168334 | 0.006227812 | 0.049979168 |
| MED23     | -1.190441635 | 0.000641955 | 0.015383885 |
| AIG1      | -1.261680719 | 0.00618304  | 0.04980902  |
| AADAT     | -2.500953608 | 0.000810399 | 0.016951958 |
| DCXR      | -2.011219036 | 0.000506672 | 0.014054629 |
| ACP6      | -1.038253312 | 0.0060918   | 0.049372839 |
| NSDHL     | -1.069908041 | 0.001435887 | 0.021911473 |
| CSAD      | -1.438858178 | 0.004046037 | 0.03854591  |
| SCCPDH    | -1.369246349 | 0.001996633 | 0.026096837 |
| SERPINA10 | -2.842089729 | 0.001013725 | 0.018510462 |
| GDF2      | -1.506120355 | 0.003263874 | 0.033859379 |
| PIPOX     | -2.738658319 | 0.00058547  | 0.014934015 |
| RAPGEFL1  | -1.174449822 | 0.005061837 | 0.043956811 |
| CPB2      | -3.236841509 | 0.000377665 | 0.0126816   |
| SYT17     | -1.713477887 | 0.001005821 | 0.018505755 |
| HSD17B14  | -1.909974349 | 1.78E-05    | 0.005331672 |
| CYP39A1   | -2.228139986 | 0.000662238 | 0.015612309 |
| SLC6A13   | -3.980890417 | 2.46E-05    | 0.006193459 |
| CLEC1B    | -3.382471979 | 0.000229851 | 0.011445469 |
| PCYOX1    | -1.130220967 | 7.91E-05    | 0.008717971 |
| PRODH     | -1.729629934 | 0.0027719   | 0.030722647 |
| ADD2      | -1.257622206 | 0.005462743 | 0.046171415 |
| HAO2      | -2.657878049 | 0.000162474 | 0.01036584  |
| CYP3A4    | -2.4286721   | 0.000932326 | 0.01793028  |
| RNF43     | -1.805836185 | 0.000317052 | 0.012254849 |
| HAO1      | -3.222975786 | 0.000260695 | 0.011775105 |
| BHMT2     | -3.362406121 | 0.000478714 | 0.013669124 |
| SEMA4G    | -2.794176182 | 0.001253928 | 0.020398568 |
| SLC38A4   | -2.601086889 | 0.000770143 | 0.016486247 |
| ANO1      | -2.950939317 | 3.61E-05    | 0.007011546 |
| LPPR1     | -1.938806835 | 0.002521957 | 0.029204923 |
| CDHR2     | -2.842451799 | 0.001376736 | 0.021488871 |
| FAM82A2   | -1.29029556  | 0.001846359 | 0.025046686 |
| ETNK2     | -2.570018556 | 0.000544718 | 0.014499307 |
| SLC47A1   | -1.992933417 | 0.000739604 | 0.016396702 |
| PARP16    | -1.086546717 | 0.001430128 | 0.021870778 |
| MOCOS     | -1.717898484 | 0.003267833 | 0.033866032 |
| STAP2     | -1.954350682 | 0.004478365 | 0.040876238 |

|          |              |             |             |
|----------|--------------|-------------|-------------|
| TTC38    | -1.418885681 | 0.000915003 | 0.017877478 |
| LIME1    | -1.566242581 | 0.000382671 | 0.012777971 |
| ACSM5    | -2.480992259 | 0.000880051 | 0.017666783 |
| MOSC2    | -2.364019763 | 0.000728639 | 0.016329187 |
| C4orf19  | -2.772861575 | 0.000327369 | 0.012254849 |
| PNPO     | -1.507305941 | 0.001819591 | 0.02483207  |
| GPRC5C   | -1.751932902 | 3.27E-05    | 0.006889194 |
| BEX1     | -1.54932791  | 0.004727645 | 0.042040979 |
| B3GAT1   | -1.902466197 | 0.001303221 | 0.020787074 |
| ACSS2    | -1.244454685 | 0.000397381 | 0.012854122 |
| TMEM176A | -1.752045783 | 0.002042843 | 0.026329981 |
| CHDH     | -2.478489123 | 0.002615846 | 0.029685999 |
| PECR     | -2.390541331 | 0.001965046 | 0.025849469 |
| PXMP2    | -2.432293021 | 0.000338767 | 0.012254849 |
| C19orf80 | -2.306394829 | 9.76E-05    | 0.008856782 |
| ACOT13   | -1.125303814 | 0.003994006 | 0.038399232 |
| OGDHL    | -3.285197077 | 0.000465364 | 0.013533993 |
| ECHDC2   | -2.313824154 | 4.37E-06    | 0.003192872 |
| FGGY     | -1.955801911 | 0.001312282 | 0.020881961 |
| MOV10L1  | -1.440580738 | 0.004152343 | 0.039120551 |
| GNMT     | -2.884305512 | 0.000446526 | 0.01332889  |
| UNC93A   | -2.258715956 | 0.004356982 | 0.040140857 |
| APOM     | -1.62058545  | 0.001557616 | 0.022828632 |
| IL17RB   | -2.34181727  | 0.00521733  | 0.044850243 |
| ERRFI1   | -3.109635145 | 0.001059713 | 0.018878801 |
| FAM134B  | -1.827647909 | 0.001452089 | 0.0220908   |
| NECAB2   | -2.245851386 | 0.001121392 | 0.019278478 |
| DHTKD1   | -2.093434113 | 0.000338636 | 0.012254849 |
| SLCO1B3  | -3.587537182 | 0.000166171 | 0.010479165 |
| FAM20C   | -1.503400042 | 0.002155385 | 0.027112966 |
| ABCC9    | -2.207443117 | 6.12E-06    | 0.004030853 |
| GPR126   | -1.196897954 | 0.001207625 | 0.020026719 |
| CGN      | -2.527584244 | 0.000719155 | 0.016240629 |
| GPHN     | -1.515884958 | 0.004038233 | 0.038507502 |
| PITPNM2  | -1.421410234 | 0.000268519 | 0.011954174 |
| SPHK2    | -1.010214816 | 0.000909299 | 0.017877478 |
| ABCC9    | -2.209363252 | 0.000608657 | 0.015117199 |
| PPM1H    | -1.395438135 | 0.002796717 | 0.030880359 |
| HAMP     | -3.078185534 | 3.41E-05    | 0.007011546 |
| MST1     | -2.367772608 | 0.001048009 | 0.018768556 |
| CYP4F11  | -2.930650688 | 0.000202675 | 0.011049475 |
| GPAM     | -2.671262833 | 0.000350909 | 0.012360149 |
| UGT2B4   | -2.797477792 | 0.001551468 | 0.022822466 |
| GBA3     | -2.809676148 | 2.54E-05    | 0.006254726 |

|          |              |             |             |
|----------|--------------|-------------|-------------|
| ADCY1    | -2.431664832 | 0.000574879 | 0.014877663 |
| KIAA1161 | -1.852485562 | 0.003606621 | 0.035744069 |
| AQP9     | -3.04364268  | 0.000244646 | 0.011672752 |
| AVPI1    | -1.19977476  | 0.000426832 | 0.013045227 |
| HPR      | -1.606770069 | 0.001689247 | 0.023827496 |
| CFHR3    | -2.951283574 | 0.001247449 | 0.020340824 |
| CLDN1    | -2.210852727 | 0.003249639 | 0.033797574 |
| CROT     | -1.659423364 | 0.001845645 | 0.025046686 |
| GNAO1    | -2.524193079 | 5.11E-05    | 0.007824954 |
| BMP5     | -1.69962357  | 0.003168556 | 0.033298891 |
| DAB1     | -2.355570228 | 0.000132478 | 0.00971712  |
| PSAT1    | -2.450767842 | 0.001325499 | 0.020984449 |
| HCN3     | -1.654490268 | 0.004369289 | 0.040181715 |
| DNAJC12  | -2.55266976  | 0.001300637 | 0.020786211 |
| GYS2     | -3.355568563 | 0.001026938 | 0.01857039  |
| NR1I2    | -3.249573155 | 0.000562738 | 0.014710456 |
| SLC22A3  | -1.670374472 | 0.002990073 | 0.032230901 |
| TP53INP2 | -1.579427287 | 0.001204944 | 0.020026719 |
| FGG      | -2.834774491 | 0.005078746 | 0.044008348 |
| FGA      | -2.701827434 | 0.00117561  | 0.019694888 |
| PRODH2   | -2.964332765 | 0.000247606 | 0.01169459  |
| CDHR5    | -1.948701956 | 0.004347087 | 0.040122117 |
| ABCG8    | -1.46010976  | 0.003827617 | 0.037282741 |
| SLC17A9  | -1.667208499 | 0.002736965 | 0.030515587 |
| C11orf24 | -1.216007628 | 0.004763201 | 0.042188945 |
| GPRC5C   | -1.539305341 | 0.000733141 | 0.016396702 |
| SFXN1    | -1.66625465  | 0.001064968 | 0.018917117 |
| MOSC1    | -2.651434308 | 0.000331579 | 0.012254849 |
| PBLD     | -3.48502712  | 7.99E-05    | 0.008717971 |
| PC       | -2.123924279 | 0.00141634  | 0.021775325 |
| FN3K     | -1.14392602  | 0.005487068 | 0.046329192 |
| C11orf1  | -1.49210206  | 0.002071166 | 0.026507793 |
| ALDH8A1  | -3.388017502 | 0.000706567 | 0.016099625 |
| SLC13A3  | -1.673614472 | 0.002220873 | 0.027380043 |
| FGFR3    | -2.379371303 | 0.002507828 | 0.029123897 |
| ATP13A3  | -1.1200535   | 0.004719279 | 0.042018665 |
| ELOVL6   | -1.273663468 | 0.003289457 | 0.033942283 |
| TTPAL    | -1.114771669 | 0.000854045 | 0.017349426 |
| AGMAT    | -3.271760505 | 0.000147025 | 0.010072696 |
| TMEM38A  | -1.795956782 | 5.33E-05    | 0.007887593 |
| C2orf47  | -1.229526729 | 0.003591331 | 0.035662712 |
| LPAL2    | -2.132414458 | 0.00222585  | 0.027391776 |
| C7orf10  | -2.449979157 | 0.000830789 | 0.01715383  |
| RNF128   | -2.53251885  | 0.003032631 | 0.032513578 |

|          |              |             |             |
|----------|--------------|-------------|-------------|
| GRTP1    | -1.973949463 | 0.002505894 | 0.029118002 |
| FBXO17   | -1.736729785 | 0.000759538 | 0.016486247 |
| DNAJC22  | -2.931222313 | 0.000953708 | 0.018086189 |
| PPP1R3B  | -2.004577871 | 0.000591933 | 0.014990032 |
| TRIB1    | -1.251359245 | 0.003689811 | 0.036147402 |
| PNPLA3   | -3.142420639 | 0.000275462 | 0.012003271 |
| CFHR5    | -2.910077886 | 0.001266056 | 0.020497859 |
| SLC19A3  | -2.137640007 | 0.000618159 | 0.015131243 |
| COL18A1  | -1.315940573 | 0.004303614 | 0.039919393 |
| APOL5    | -1.618354215 | 0.005518949 | 0.046463862 |
| PQLC1    | -1.471212252 | 0.000327377 | 0.012254849 |
| AMN      | -1.362434602 | 7.81E-05    | 0.008717971 |
| HDHD3    | -1.948348036 | 0.000106926 | 0.009156966 |
| AGXT2    | -2.266296613 | 0.000846673 | 0.017311984 |
| AGXT2L1  | -3.574416599 | 0.000186018 | 0.010667842 |
| FAM83D   | -1.025425807 | 0.003632236 | 0.035858672 |
| FAHD1    | -1.316082864 | 0.000949953 | 0.018086189 |
| ESPN     | -1.183437243 | 0.000698003 | 0.016028594 |
| SLC25A18 | -2.998203856 | 0.002614411 | 0.029685999 |
| ZNRF1    | -1.890302924 | 0.000408695 | 0.012996767 |
| TOMM40L  | -1.346379256 | 0.000474785 | 0.013629768 |
| AGTR1    | -1.5071762   | 0.006120912 | 0.049460979 |
| ALKBH7   | -1.116158898 | 0.002049987 | 0.026387285 |
| RBP5     | -1.095449357 | 0.00021838  | 0.011351772 |
| TTBK1    | -1.874828635 | 6.15E-05    | 0.008053145 |
| ZNRF3    | -1.692824793 | 0.00084976  | 0.017327378 |
| RTP3     | -2.968735923 | 0.000713896 | 0.016176355 |
| INHBE    | -2.593241404 | 0.002626594 | 0.029721626 |
| ZGPAT    | -1.91940609  | 0.000968537 | 0.018241367 |
| KIAA1804 | -1.393783907 | 0.003051336 | 0.032615752 |
| CNDP1    | -3.542753899 | 1.07E-05    | 0.004370993 |
| CFC1     | -1.168240241 | 0.002411676 | 0.028493505 |
| CBR4     | -1.077089686 | 0.004646809 | 0.041737459 |
| NR1I2    | -3.099679298 | 0.000235225 | 0.011553369 |
| PLA2G12B | -2.982206365 | 0.001897273 | 0.025366557 |
| DGAT2    | -3.553405779 | 4.54E-05    | 0.007487582 |
| ABHD1    | -1.3884175   | 0.000235413 | 0.011553369 |
| CGNL1    | -2.705078111 | 0.001505416 | 0.022532557 |
| MT4      | -1.869778515 | 0.003963002 | 0.038236605 |
| RTKN     | -1.53624997  | 0.001879571 | 0.025312214 |
| TRIM55   | -2.390190565 | 0.000346985 | 0.012360149 |
| HSPB9    | -1.557665022 | 0.000277778 | 0.012003271 |
| APOA5    | -2.924325836 | 0.002289022 | 0.027739133 |
| EMILIN3  | -1.917204803 | 0.001693139 | 0.023839402 |

|          |              |             |             |
|----------|--------------|-------------|-------------|
| LEAP2    | -3.036408571 | 0.001801692 | 0.024653709 |
| ADRA1A   | -1.456235541 | 0.003486478 | 0.035081292 |
| ENO3     | -2.475747567 | 1.04E-05    | 0.004370993 |
| MIA2     | -2.378968086 | 0.001526043 | 0.02265869  |
| SEC14L2  | -1.348871947 | 0.00063959  | 0.015362193 |
| TMEM205  | -1.015550089 | 0.000773363 | 0.016532964 |
| PSAT1    | -2.488723361 | 0.002143187 | 0.027026133 |
| MAL2     | -2.547973633 | 0.004723584 | 0.042038664 |
| B3GAT1   | -1.817207984 | 0.001132877 | 0.019288835 |
| MOGAT1   | -2.804248883 | 5.92E-05    | 0.008053145 |
| PGLYRP2  | -2.672514657 | 0.000520127 | 0.014177441 |
| UGT2B28  | -2.792206827 | 0.001127526 | 0.019278478 |
| CYP26A1  | -1.38545051  | 6.57E-05    | 0.008063947 |
| OLFM2    | -3.05504229  | 0.000109908 | 0.009156966 |
| TADA1    | -1.866660574 | 0.000308254 | 0.012234335 |
| ASGR2    | -3.197991788 | 0.001315691 | 0.020903609 |
| SHROOM1  | -1.795489632 | 0.002898294 | 0.031608746 |
| PAGE5    | -1.777625308 | 8.38E-05    | 0.00872223  |
| FN1      | -3.105647051 | 7.48E-05    | 0.008554709 |
| COL18A1  | -1.311311342 | 0.001735522 | 0.024235584 |
| ABCA6    | -1.817477122 | 0.002736447 | 0.030515587 |
| SLC22A9  | -2.408216855 | 0.00082832  | 0.017151099 |
| MBNL3    | -1.471585328 | 0.003109394 | 0.032943118 |
| ASGR2    | -2.956262238 | 0.000527691 | 0.014292776 |
| ACOT12   | -2.752988267 | 0.003684463 | 0.036147039 |
| MLIP     | -2.617079692 | 0.005267072 | 0.045105928 |
| CALML6   | -1.133004932 | 0.00146549  | 0.022211915 |
| C13orf27 | -1.423036094 | 0.003333109 | 0.034161022 |
| PTPRD    | -1.133825536 | 0.002026271 | 0.026193636 |
| IL1RAP   | -1.895275335 | 0.004556447 | 0.041289131 |
| GPT2     | -2.259453382 | 0.004084493 | 0.038751077 |
| PANK1    | -2.049272864 | 0.006122018 | 0.049460979 |
| REEP6    | -2.684420257 | 0.000427604 | 0.013049287 |
| ACMSD    | -3.637125121 | 0.000560968 | 0.014710456 |
| DEPDC7   | -2.455965331 | 0.002194588 | 0.027219455 |
| MASP2    | -1.583069524 | 0.00318294  | 0.03337591  |
| MASP1    | -2.905491939 | 0.000701879 | 0.016028594 |
| A1CF     | -3.114555613 | 0.000574796 | 0.014877663 |
| NAPRT1   | -1.103795997 | 0.004577164 | 0.041403363 |
| LRRC45   | -1.069568298 | 0.003408132 | 0.034565756 |
| CMBL     | -2.010848667 | 0.000151364 | 0.01013002  |
| ADAMTS13 | -2.35758626  | 0.000196537 | 0.011046469 |
| SLC39A11 | -1.354930212 | 0.002272757 | 0.027705534 |
| RANBP3L  | -1.721169402 | 0.001466672 | 0.022213331 |

|          |              |             |             |
|----------|--------------|-------------|-------------|
| PRAP1    | -2.670389745 | 0.000768874 | 0.016486247 |
| UROC1    | -2.293028498 | 0.001202509 | 0.020024815 |
| MARVELD2 | -2.168266508 | 0.003905742 | 0.0378451   |
| HFE2     | -3.038402954 | 0.000253057 | 0.01169459  |
| SHMT1    | -1.882884489 | 0.000719914 | 0.016240629 |
| CES5A    | -1.35599214  | 0.003371023 | 0.034394209 |
| KLHDC7A  | -2.028871277 | 0.002027133 | 0.026193636 |
| IL27     | -1.22335406  | 0.002984094 | 0.032200457 |
| PEMT     | -1.614478231 | 0.001208678 | 0.020026719 |
| GPR125   | -2.149513078 | 0.000897706 | 0.017793745 |
| GSTZ1    | -2.116843554 | 0.00106557  | 0.018917117 |
| GSTA1    | -3.206639758 | 4.08E-05    | 0.007183485 |
| GSTZ1    | -1.958989559 | 0.000353222 | 0.012360149 |
| ANKS4B   | -1.287707377 | 0.003398118 | 0.034549794 |
| ATP1A3   | -1.190755472 | 0.002846281 | 0.03125108  |
| OCIAD2   | -1.552036644 | 0.004203483 | 0.039420446 |
| CYB5A    | -1.166582304 | 0.001605154 | 0.023192377 |
| CLRN3    | -2.758592743 | 0.000292671 | 0.012095493 |
| FBXO17   | -1.68616977  | 0.001028458 | 0.01857907  |
| ACOT4    | -1.620992206 | 0.002503844 | 0.029110756 |
| ZNF385B  | -1.679345384 | 0.00028385  | 0.012019591 |
| METTL7B  | -2.561064327 | 0.005565367 | 0.0466569   |
| HIBADH   | -1.012993638 | 0.00122975  | 0.020263577 |
| PANK1    | -2.554385811 | 0.002620543 | 0.029695771 |
| AMDHD1   | -2.942143613 | 0.001702966 | 0.023895361 |
| USP43    | -1.182174529 | 0.003312108 | 0.034072833 |
| SH3RF2   | -1.473511114 | 0.002921838 | 0.031739963 |
| SOX5     | -1.274870261 | 0.001265473 | 0.020497859 |
| NAGS     | -2.94417516  | 3.59E-06    | 0.003190249 |
| SLC22A1  | -3.183009533 | 6.18E-05    | 0.008053145 |
| RGN      | -1.763917326 | 0.001682013 | 0.023755519 |
| SLC22A7  | -2.766114894 | 0.000503756 | 0.014030957 |
| IL17RC   | -1.140683119 | 0.00039502  | 0.012854122 |
| SLC23A1  | -1.682618859 | 0.002897445 | 0.031608746 |
| TTC39C   | -1.480843475 | 0.002562617 | 0.029497124 |
| FOXA2    | -2.155138686 | 0.005454117 | 0.046127282 |
| GSTA5    | -2.667999899 | 0.003261637 | 0.033853372 |
| ALDH5A1  | -1.788617176 | 0.001035729 | 0.018646769 |
| KCNE2    | -1.277461583 | 0.003409847 | 0.034565756 |
| LDHD     | -2.008684197 | 0.002201791 | 0.02724349  |
| TMPRSS6  | -2.863201175 | 0.000426477 | 0.013045227 |
| ALDH8A1  | -3.495121639 | 0.000420339 | 0.013042003 |
| FOLH1B   | -2.503580659 | 0.000228486 | 0.011445469 |
| RDH10    | -1.69356817  | 0.004325866 | 0.040049374 |

|           |              |             |             |
|-----------|--------------|-------------|-------------|
| ALDH4A1   | -2.481717071 | 0.001137054 | 0.019312891 |
| FCN3      | -2.975245321 | 0.000680193 | 0.015907016 |
| SLC39A5   | -1.62825271  | 0.000251177 | 0.01169459  |
| TPPP2     | -3.117890447 | 0.000133268 | 0.00971712  |
| RNF152    | -1.392399554 | 0.004397994 | 0.040372954 |
| TMEM86B   | -1.207567572 | 0.000562509 | 0.014710456 |
| KRTCAP3   | -1.319025615 | 0.001947631 | 0.025686587 |
| UNC5CL    | -1.435492085 | 0.002191273 | 0.027219455 |
| PCSK9     | -2.143574014 | 0.001841776 | 0.025034422 |
| SLC13A5   | -3.046885493 | 0.000758314 | 0.016486247 |
| GGTLC1    | -2.09409535  | 0.000333562 | 0.012254849 |
| C11orf35  | -1.611655503 | 0.002138805 | 0.026995504 |
| SEC14L4   | -2.891166332 | 5.28E-05    | 0.007863953 |
| GPLD1     | -2.473874393 | 0.000498199 | 0.014019431 |
| HNF4A     | -3.104951191 | 0.00028957  | 0.012095493 |
| SLCO4C1   | -1.414731836 | 0.003683922 | 0.036147039 |
| PIGW      | -1.008738837 | 0.006194444 | 0.049844697 |
| KLB       | -1.745034832 | 0.000363722 | 0.012564729 |
| MT1E      | -2.069023983 | 0.00037409  | 0.012603013 |
| CMTM8     | -2.200513586 | 0.002638238 | 0.029781319 |
| SERINC2   | -2.326486324 | 0.001993094 | 0.026067265 |
| SERINC5   | -1.579103305 | 0.000279936 | 0.012003271 |
| GGTLC1    | -1.094180504 | 0.006196407 | 0.049844697 |
| FAM151A   | -2.470906624 | 1.98E-05    | 0.005519794 |
| HSD17B13  | -3.564205343 | 0.00018347  | 0.010584994 |
| IL6R      | -1.460894512 | 0.004020119 | 0.03844196  |
| MOGAT3    | -1.558717034 | 0.00343176  | 0.034683141 |
| HNF4A     | -2.25468689  | 0.001112386 | 0.019243112 |
| ID1       | -1.552241987 | 0.003137874 | 0.033124526 |
| HSD11B1   | -2.936166331 | 0.001020748 | 0.018564781 |
| SLC9B2    | -2.202813541 | 0.002398434 | 0.02836989  |
| ACSM2B    | -2.958169779 | 0.000208373 | 0.011165731 |
| STEAP3    | -2.828209176 | 0.002930228 | 0.031787209 |
| TRIM55    | -1.475105814 | 0.000259422 | 0.01174361  |
| CERS2     | -1.220542467 | 0.000984897 | 0.018413405 |
| LDHD      | -1.590060271 | 0.003295817 | 0.033966377 |
| AADAT     | -2.202194019 | 0.002357254 | 0.028151978 |
| HPN       | -2.680510133 | 0.00148756  | 0.022363784 |
| OSGIN1    | -1.514822465 | 0.000437045 | 0.013140968 |
| TRIM55    | -1.768096013 | 2.54E-05    | 0.006254726 |
| CCNB1IP1  | -1.001996185 | 0.001556077 | 0.022822466 |
| C10orf125 | -1.550063554 | 0.00411512  | 0.038913524 |
| NRAP      | -1.849035744 | 0.002257949 | 0.027603763 |
| TRIM73    | -1.248170059 | 0.005186178 | 0.044694394 |

|           |              |             |             |
|-----------|--------------|-------------|-------------|
| NNT       | -1.316766349 | 0.002614354 | 0.029685999 |
| RNF128    | -3.30548814  | 0.001226068 | 0.020219222 |
| INSIG1    | -2.365817884 | 0.005428676 | 0.046043942 |
| ALAS1     | -2.303374071 | 0.002656367 | 0.029946098 |
| PHLPP1    | -1.546014438 | 0.004395992 | 0.040372727 |
| KRTAP12-4 | -1.094956846 | 0.003897419 | 0.037800336 |
| ZDHHC16   | -1.286862025 | 0.001001291 | 0.018471549 |
| TMEM205   | -1.33334781  | 0.005360104 | 0.04559662  |
| GPR126    | -1.4823746   | 0.000322032 | 0.012254849 |
| NUDT6     | -1.376382556 | 0.001331737 | 0.021029389 |
| DHRS4L2   | -1.089268955 | 0.000499308 | 0.014019431 |
| TJP2      | -1.788842252 | 0.000324562 | 0.012254849 |
| BDH1      | -2.239274144 | 0.00405296  | 0.038577987 |
| LSR       | -1.678332135 | 0.000281695 | 0.012006454 |
| ACSM3     | -3.044907607 | 0.000154213 | 0.010188496 |
| ABHD15    | -1.134000169 | 0.004086553 | 0.038751077 |
| DPPA3     | -1.113252066 | 0.004183399 | 0.039304317 |
| PRB1      | -1.137156669 | 0.000416941 | 0.013005203 |
| FAM171A2  | -1.163311003 | 0.001014371 | 0.018510462 |
| CLEC4G    | -2.758062635 | 0.00035679  | 0.01240923  |
| GOLT1A    | -2.224411287 | 0.004761379 | 0.042188945 |
| C1S       | -1.161093941 | 0.000991461 | 0.018468674 |
| GGTLC2    | -1.860639001 | 0.001051491 | 0.018814407 |
| HOMER2    | -1.635210878 | 0.000305836 | 0.012195229 |
| GLYAT     | -1.166982105 | 0.003510836 | 0.03525688  |
| CLYBL     | -1.622497979 | 0.000847114 | 0.017311984 |
| COLEC11   | -2.432511537 | 0.003165927 | 0.033298891 |
| RCAN1     | -1.512705429 | 0.005305506 | 0.045267822 |
| HSPD1     | -1.058366553 | 0.003630533 | 0.035858672 |
| RCAN1     | -1.715102895 | 0.005473313 | 0.046232174 |
| LPPR1     | -1.998779655 | 0.002461779 | 0.028868277 |
| AK4       | -2.835481017 | 0.000347845 | 0.012360149 |
| CRIP3     | -2.676415053 | 0.000359253 | 0.012443221 |
| SLC28A1   | -1.401999122 | 0.002306671 | 0.027873334 |
| ADAMTSL3  | -1.481401141 | 0.000383424 | 0.012777971 |
| AMACR     | -2.4462936   | 0.001416901 | 0.021775325 |
| CHCHD10   | -1.021900575 | 0.006068701 | 0.049259401 |
| GBP7      | -2.649235297 | 0.002555037 | 0.029454336 |
| ECI2      | -1.730166667 | 0.003767366 | 0.036830235 |
| SLC26A1   | -1.507309116 | 8.98E-05    | 0.00872223  |
| HFE2      | -3.761654314 | 0.000434725 | 0.013136157 |
| USH2A     | -4.299344911 | 6.77E-07    | 0.001973632 |
| SLC25A47  | -3.190045088 | 0.002303436 | 0.027873334 |
| FN1       | -2.77320186  | 0.000569534 | 0.014812232 |

|        |              |             |             |
|--------|--------------|-------------|-------------|
| FGFR4  | -1.477916796 | 0.000233463 | 0.011513009 |
| FTCD   | -1.096721436 | 0.002813763 | 0.031010118 |
| HFE2   | -3.457602977 | 0.000432286 | 0.013136157 |
| ACVRL1 | 1.511093145  | 0.001347114 | 0.021139649 |
| CD3G   | 1.435709424  | 0.002284419 | 0.027739133 |
| CDKN1C | 1.517913649  | 0.004075408 | 0.038717327 |
| COL1A2 | 1.213423659  | 0.002390579 | 0.02835452  |
| CYP1B1 | 1.61671274   | 0.001417629 | 0.021775325 |
| ENG    | 1.093639031  | 0.006041703 | 0.049122826 |
| IL2RG  | 1.550878684  | 0.001291896 | 0.02070278  |
| ITGB2  | 1.603350744  | 0.000261986 | 0.011799544 |
| JAG1   | 1.509194262  | 5.21E-05    | 0.007824954 |
| JAK3   | 1.886122465  | 0.000353562 | 0.012360149 |
| KIT    | 1.635295343  | 0.004736625 | 0.042063046 |
| LIPA   | 1.575435698  | 2.80E-05    | 0.006427112 |
| MYO5A  | 1.038544628  | 0.002896593 | 0.031608746 |
| PFKM   | 1.095526447  | 0.002463433 | 0.028871094 |
| TIMP3  | 1.142003223  | 0.002139436 | 0.026995504 |
| WAS    | 1.951685681  | 0.000476922 | 0.013647112 |
| CHM    | 1.140754833  | 0.001692694 | 0.023839402 |
| CSF2RB | 1.675487771  | 0.000183676 | 0.010584994 |
| CYBB   | 1.530085599  | 0.002201693 | 0.02724349  |
| GPD2   | 1.490563569  | 1.94E-05    | 0.00550707  |
| IFNGR1 | 1.438585002  | 0.000154608 | 0.010188496 |
| NCF2   | 1.667643243  | 0.000370024 | 0.012603013 |
| NOTCH3 | 1.795912453  | 0.004889173 | 0.04291374  |
| RFX5   | 1.466373612  | 0.000404855 | 0.01295535  |
| AK1    | 1.207639199  | 0.000925599 | 0.017880184 |
| ATRX   | 1.47725776   | 0.000397914 | 0.012854122 |
| C1QB   | 1.576643729  | 0.00034922  | 0.012360149 |
| HBB    | 1.314632792  | 0.002739599 | 0.030515587 |
| VWF    | 2.843952784  | 0.000124745 | 0.009595296 |
| CD53   | 2.622729274  | 6.45E-06    | 0.004112796 |
| FCGR3A | 1.430836112  | 0.005074627 | 0.044008348 |
| FCGR3B | 2.229453746  | 0.000253561 | 0.01169459  |
| CCR5   | 1.637899088  | 0.00083213  | 0.01715383  |
| TAP1   | 1.348287799  | 0.000461136 | 0.013481053 |
| NOS3   | 2.654090904  | 0.000739683 | 0.016396702 |
| BCL2   | 2.390466847  | 0.000182684 | 0.010584994 |
| SELL   | 2.324686499  | 0.000336203 | 0.012254849 |
| ADRA2A | 2.056976898  | 0.000171582 | 0.010584994 |
| ANXA1  | 1.142925614  | 0.003501729 | 0.035182725 |
| BLVRA  | 2.349921279  | 0.000547576 | 0.014537478 |
| CD3D   | 1.454834776  | 0.002350888 | 0.028117005 |

|          |             |             |             |
|----------|-------------|-------------|-------------|
| CSF2     | 1.458098203 | 0.00034643  | 0.012360149 |
| GNRH1    | 1.104187487 | 0.000295734 | 0.012102504 |
| GSTP1    | 1.209790063 | 0.001861644 | 0.025170418 |
| GUCY1A3  | 1.483138873 | 0.000227665 | 0.011445469 |
| IFNAR2   | 1.005289622 | 0.00232159  | 0.027880924 |
| IL2RB    | 1.447236891 | 0.00207829  | 0.026552173 |
| KCNJ5    | 2.341391086 | 0.00093747  | 0.017971251 |
| KCNJ2    | 1.430161849 | 0.005323701 | 0.045335156 |
| NPR3     | 2.122990861 | 1.29E-06    | 0.002207111 |
| NPY1R    | 2.43830577  | 6.91E-05    | 0.008226635 |
| PAM      | 1.404558141 | 0.000992595 | 0.018471549 |
| PDE1B    | 1.33028108  | 0.004298836 | 0.039893195 |
| PTGER4   | 1.951091826 | 0.000946965 | 0.018068448 |
| PTGS1    | 1.127880269 | 0.001914219 | 0.025476329 |
| ZDHHC13  | 1.860723208 | 5.91E-05    | 0.008053145 |
| PDE9A    | 1.968451784 | 0.000592523 | 0.014990032 |
| RUNX1    | 1.253262423 | 0.000370698 | 0.012603013 |
| GPM6B    | 1.631698693 | 0.004208436 | 0.039431204 |
| WLS      | 1.593018834 | 3.59E-05    | 0.007011546 |
| BICD1    | 1.896238712 | 0.001682527 | 0.023755519 |
| OSBPL8   | 1.084832175 | 0.000957509 | 0.018117246 |
| RBMS3    | 1.695771739 | 1.07E-06    | 0.002207111 |
| RBMS3    | 1.511945061 | 0.000395645 | 0.012854122 |
| TARP     | 1.745678434 | 0.001651751 | 0.023581927 |
| TRIM6    | 1.692897166 | 0.000112019 | 0.009156966 |
| EVI2A    | 2.08861916  | 9.07E-05    | 0.00872223  |
| FCRL6    | 1.75149917  | 0.002745012 | 0.030520361 |
| NCK2     | 1.471765275 | 0.001844698 | 0.025046686 |
| OR5AK2   | 1.698114763 | 0.003452838 | 0.03481143  |
| DNM2     | 1.060042177 | 0.005184797 | 0.044694394 |
| ACTR2    | 1.086190475 | 0.006150712 | 0.04961396  |
| WBP5     | 1.992561467 | 1.13E-05    | 0.004370993 |
| GTDC1    | 1.30611321  | 7.14E-05    | 0.008325379 |
| TCEAL1   | 1.330245002 | 0.000193557 | 0.010934129 |
| CR2      | 2.372963556 | 0.003224152 | 0.033645663 |
| RPS6KA1  | 1.149513473 | 0.002002469 | 0.026139644 |
| RPS6KA2  | 2.065790389 | 0.002693772 | 0.030242329 |
| TCEAL3   | 1.876834719 | 0.000182092 | 0.010584994 |
| ODF2L    | 1.438476712 | 0.002578342 | 0.029538488 |
| SDCBP    | 1.078982225 | 0.000319484 | 0.012254849 |
| SDCBP    | 1.572045959 | 0.001001568 | 0.018471549 |
| ARHGAP25 | 1.358168431 | 0.001436009 | 0.021911473 |
| STH      | 1.234606701 | 0.000244707 | 0.011672752 |
| MXRA7    | 1.578226422 | 0.003174477 | 0.033321403 |

|           |             |             |             |
|-----------|-------------|-------------|-------------|
| LGMN      | 1.737260658 | 0.000181802 | 0.010584994 |
| CLSTN1    | 1.007445499 | 0.001073662 | 0.018994698 |
| C20orf194 | 1.461972043 | 0.000206658 | 0.011102961 |
| ARHGAP28  | 2.658056775 | 0.003329141 | 0.034159265 |
| FAM102B   | 1.146753713 | 0.004214287 | 0.039431204 |
| FAM26F    | 2.588356262 | 1.54E-05    | 0.004907082 |
| TMEM44    | 1.250738915 | 0.0018883   | 0.025351442 |
| IL32      | 1.061121892 | 0.001465376 | 0.022211915 |
| SPIN4     | 1.271042552 | 0.000951161 | 0.018086189 |
| TCEAL5    | 2.097930056 | 0.000484985 | 0.013790312 |
| LSP1      | 1.968454653 | 0.00055693  | 0.01467134  |
| C8orf58   | 1.427292019 | 0.001208478 | 0.020026719 |
| BAG5      | 1.144690726 | 0.002318673 | 0.027878698 |
| SAMD3     | 1.680050018 | 0.001115631 | 0.019249515 |
| CARD16    | 1.648502132 | 0.000149642 | 0.010125656 |
| GCOM1     | 1.402163923 | 0.000220949 | 0.011391124 |
| PIR       | 1.33847182  | 0.000503658 | 0.014030957 |
| HIST2H2BF | 2.136181115 | 0.000610233 | 0.015131243 |
| TGFBR2    | 1.099383237 | 0.000606115 | 0.015107025 |
| CELF2     | 1.579096051 | 0.005038916 | 0.04381563  |
| CD47      | 1.716507405 | 0.002023706 | 0.026193636 |
| CD74      | 1.782767188 | 1.69E-06    | 0.002284534 |
| CD74      | 1.35535587  | 0.000222276 | 0.011408959 |
| CD97      | 1.164586132 | 0.004954669 | 0.043209963 |
| CHI3L2    | 2.223490262 | 0.000397823 | 0.012854122 |
| TSPAN4    | 1.221045354 | 0.000511076 | 0.014119256 |
| CXorf65   | 2.270401977 | 0.000273009 | 0.011960837 |
| ARFIP1    | 1.323130912 | 0.000329316 | 0.012254849 |
| ARHGAP30  | 2.219537491 | 0.000303982 | 0.012168812 |
| PLEKHG1   | 2.51219561  | 6.56E-05    | 0.008063947 |
| CPLX3     | 2.063126735 | 0.004354824 | 0.040139091 |
| SPN       | 1.286026308 | 0.000949033 | 0.018086189 |
| RUNX3     | 1.60894262  | 0.004235857 | 0.039542414 |
| IFIT3     | 1.282932887 | 0.000300982 | 0.012141407 |
| FAM198B   | 2.294422676 | 9.30E-07    | 0.002207111 |
| LYPD5     | 1.74709691  | 0.003909647 | 0.037847012 |
| STXBP1    | 1.700084303 | 0.001324139 | 0.020984449 |
| OAS1      | 1.517944487 | 2.94E-05    | 0.006533081 |
| OAS2      | 2.061114636 | 5.24E-07    | 0.001836216 |
| NPNT      | 1.944154955 | 0.000769909 | 0.016486247 |
| SPECC1    | 2.58101767  | 0.001779076 | 0.024541629 |
| SPECC1    | 1.791186447 | 0.002673762 | 0.030082371 |
| SPECC1    | 2.71375349  | 0.000352727 | 0.012360149 |
| CXCL12    | 1.280777402 | 0.00452433  | 0.04112588  |

|          |             |             |             |
|----------|-------------|-------------|-------------|
| TRAF5    | 1.727825261 | 0.000100326 | 0.008944329 |
| SCN1B    | 1.661253166 | 0.000853694 | 0.017349426 |
| CEP112   | 1.564774909 | 0.004879601 | 0.042898746 |
| PDE4B    | 1.328483967 | 0.004496528 | 0.040977143 |
| CDC42SE1 | 1.686487096 | 1.59E-05    | 0.004926141 |
| EFEMP1   | 1.53883208  | 0.003341126 | 0.034226009 |
| EFEMP1   | 2.864015208 | 2.39E-08    | 0.000487426 |
| MPEG1    | 2.252026513 | 0.000366153 | 0.01259222  |
| C1orf38  | 1.311928963 | 0.003078496 | 0.03279566  |
| SEC14L1  | 1.233538915 | 0.002323079 | 0.02788241  |
| C4orf29  | 1.226568051 | 0.003260358 | 0.033853372 |
| CD53     | 2.399541038 | 2.43E-05    | 0.006193459 |
| HVCN1    | 1.659895444 | 0.001887465 | 0.025351442 |
| CKLF     | 1.127203682 | 0.00318864  | 0.033418522 |
| PCDH17   | 2.84872156  | 0.000761557 | 0.016486247 |
| PHF11    | 1.038080806 | 0.000969689 | 0.018242554 |
| CD3D     | 1.548389191 | 0.000580776 | 0.014895881 |
| FAM110A  | 1.720802768 | 0.000574249 | 0.014877663 |
| FILIP1L  | 1.755400262 | 0.000751792 | 0.016486135 |
| TATDN3   | 1.480107914 | 0.001755283 | 0.02441135  |
| SRGAP2   | 1.48592631  | 0.001044014 | 0.018746344 |
| SLA      | 1.465182827 | 9.59E-05    | 0.008828413 |
| TBXAS1   | 1.514342877 | 0.002500607 | 0.029110756 |
| TKT      | 1.168508092 | 0.001232462 | 0.020291887 |
| ZNF493   | 1.581855997 | 0.001667024 | 0.023710535 |
| TP53I11  | 1.529032005 | 0.004345185 | 0.040122117 |
| ZNF436   | 1.059275341 | 0.004033651 | 0.038507502 |
| WIPF1    | 1.648486035 | 0.003759275 | 0.036774964 |
| WTH3DI   | 1.259248325 | 0.000913871 | 0.017877478 |
| VCAM1    | 2.199997634 | 0.001176908 | 0.019694888 |
| FAM153B  | 1.484169823 | 0.000650591 | 0.015462707 |
| PRNP     | 1.180306095 | 0.004518355 | 0.041089859 |
| CCDC88C  | 1.246598823 | 0.004144855 | 0.039068028 |
| MYBL1    | 1.654346442 | 0.003924025 | 0.037935958 |
| SHANK3   | 1.593889006 | 0.002515112 | 0.029158733 |
| BEX4     | 1.577503753 | 0.003992389 | 0.038399232 |
| PEAR1    | 1.281519106 | 0.001070208 | 0.018966465 |
| USP6NL   | 1.040421602 | 0.002925467 | 0.031752439 |
| SNX29    | 1.674578784 | 0.000113074 | 0.009156966 |
| UNC119B  | 1.326560921 | 0.003582948 | 0.035645009 |
| LILRB5   | 2.480895986 | 0.000110716 | 0.009156966 |
| GAB3     | 1.387105609 | 0.002633718 | 0.029756496 |
| PRF1     | 1.786355282 | 0.002194785 | 0.027219455 |
| BANK1    | 1.786147331 | 0.00358309  | 0.035645009 |

|           |             |             |             |
|-----------|-------------|-------------|-------------|
| MRAS      | 2.183798929 | 0.000110126 | 0.009156966 |
| GIT1      | 1.336388406 | 3.68E-05    | 0.00702022  |
| CCDC102B  | 1.26919622  | 0.002134787 | 0.026986877 |
| GPR34     | 2.191197513 | 3.12E-05    | 0.006699452 |
| GCNT1     | 1.658411889 | 0.000165723 | 0.010479165 |
| GCNT1     | 1.209551859 | 0.004241881 | 0.039572439 |
| GPR18     | 1.230400292 | 0.005711693 | 0.047421687 |
| KIF2A     | 1.188491484 | 0.000738258 | 0.016396702 |
| PRKG1     | 1.200854601 | 0.001396032 | 0.021636005 |
| GPR116    | 1.863853144 | 0.000458998 | 0.013481053 |
| 8-Sep     | 1.45912293  | 1.24E-05    | 0.004370993 |
| 8-Sep     | 1.401989806 | 7.59E-05    | 0.008555575 |
| TMEM91    | 1.039296477 | 0.00023158  | 0.011475579 |
| IFT74     | 1.035808721 | 0.000447078 | 0.01332889  |
| TINF2     | 1.030971993 | 0.004930539 | 0.043073118 |
| SGCE      | 1.442214029 | 0.000561167 | 0.014710456 |
| SGCE      | 1.310123531 | 0.000700369 | 0.016028594 |
| ICAM2     | 2.521339502 | 5.62E-05    | 0.008027439 |
| ICAM2     | 1.921103069 | 0.002295907 | 0.027801447 |
| MRVI1     | 1.731656553 | 0.001813342 | 0.024763337 |
| PHACTR2   | 1.779936262 | 3.58E-05    | 0.007011546 |
| SNRK      | 1.055702359 | 0.001535399 | 0.022715011 |
| PLEKHB2   | 1.640963167 | 6.27E-05    | 0.008053145 |
| FAM72B    | 1.403670739 | 0.002181763 | 0.027219455 |
| LOC645545 | 1.017926014 | 0.00352313  | 0.03534556  |
| INPP4B    | 1.343273861 | 0.001892418 | 0.025351442 |
| FAM13B    | 1.251143361 | 0.002540024 | 0.02933095  |
| HENMT1    | 1.450823356 | 0.000649555 | 0.015456073 |
| ZNF160    | 1.673935359 | 0.000725569 | 0.016288253 |
| SLC25A36  | 1.386275958 | 0.0042521   | 0.039585438 |
| PTPRM     | 1.0512545   | 0.000514    | 0.014145023 |
| NRXN3     | 2.269747944 | 0.000277652 | 0.012003271 |
| CAP1      | 1.371348838 | 0.003615684 | 0.035781781 |
| C1orf38   | 1.860310917 | 0.001485884 | 0.022362968 |
| LYN       | 2.149767457 | 0.000135284 | 0.0097252   |
| PDE4A     | 1.416174276 | 0.002393974 | 0.02835452  |
| CLIC5     | 2.955582066 | 0.001171505 | 0.019657675 |
| C1QC      | 1.905862412 | 7.00E-05    | 0.008226635 |
| TACC1     | 1.836190597 | 0.00059592  | 0.015038689 |
| PPM1M     | 1.349286588 | 0.000275328 | 0.012003271 |
| ADPRH     | 1.675642796 | 0.002013579 | 0.026193636 |
| FAM178B   | 1.905656403 | 0.000618857 | 0.015131243 |
| SLC7A7    | 1.708276172 | 0.001599833 | 0.023164674 |
| SLC39A10  | 2.171792092 | 0.000125745 | 0.009595296 |

|          |             |             |             |
|----------|-------------|-------------|-------------|
| CYBRD1   | 1.483650234 | 0.005651369 | 0.047073987 |
| CDKN1C   | 1.642009125 | 0.004859421 | 0.042795839 |
| ZBTB1    | 1.22897336  | 0.0006952   | 0.016028594 |
| VCAN     | 1.435189187 | 0.002169534 | 0.027171364 |
| FCGR3A   | 1.779699628 | 0.000324164 | 0.012254849 |
| FCGR3A   | 2.348579232 | 3.59E-05    | 0.007011546 |
| GSN      | 1.247850625 | 0.000435371 | 0.013136157 |
| PHTF2    | 1.007952548 | 0.002713516 | 0.030305881 |
| PSIP1    | 1.200338799 | 0.002232993 | 0.027430074 |
| VGLL4    | 1.155354773 | 0.000255272 | 0.01169459  |
| ARHGEF3  | 1.575744132 | 0.000203512 | 0.011049475 |
| ARHGEF3  | 1.373659963 | 0.003166653 | 0.033298891 |
| LIPA     | 1.708315197 | 0.000233088 | 0.011513009 |
| ACTN1    | 1.111510306 | 0.000642    | 0.015383885 |
| IFI27    | 1.913728538 | 3.89E-05    | 0.00715555  |
| GUCY1A3  | 1.934922344 | 0.000448648 | 0.013349109 |
| MARK3    | 1.363569276 | 0.000161028 | 0.010338219 |
| LRRC32   | 1.287490064 | 8.97E-05    | 0.00872223  |
| HMGB2    | 1.24435267  | 0.000417646 | 0.013005203 |
| TBXAS1   | 1.510827578 | 0.002188175 | 0.027219455 |
| MEF2C    | 2.127784086 | 8.90E-05    | 0.00872223  |
| LEPREL1  | 1.60767993  | 0.002030826 | 0.026224752 |
| GSN      | 1.096917654 | 0.004012872 | 0.038427202 |
| STXBP5   | 1.00603233  | 0.005233272 | 0.044929553 |
| DYSF     | 1.091813561 | 0.002394357 | 0.02835452  |
| GSN      | 1.159620537 | 0.000745325 | 0.016450333 |
| UGT8     | 1.453827125 | 0.001156676 | 0.019516273 |
| DTNA     | 1.256851294 | 0.000747929 | 0.01645871  |
| DNAJA4   | 1.45851125  | 0.000507659 | 0.014062909 |
| GUCY1A3  | 1.608997165 | 0.001852341 | 0.025080302 |
| HMGB2    | 1.416126532 | 0.000579624 | 0.014895881 |
| ENPP2    | 1.58046201  | 0.00038518  | 0.012777971 |
| ZBTB4    | 1.312464233 | 0.00120034  | 0.020015789 |
| CYB561D1 | 1.030229304 | 0.005743817 | 0.047553723 |
| GBP5     | 1.658532744 | 0.002145484 | 0.027038401 |
| GIT2     | 1.031665569 | 0.001437723 | 0.021921252 |
| C1QTNF7  | 1.561769826 | 0.002387327 | 0.028349975 |
| ABLIM2   | 1.85796768  | 4.24E-05    | 0.007335659 |
| GAS7     | 2.656680805 | 0.00090152  | 0.017837372 |
| DYSF     | 1.112208256 | 0.005538788 | 0.046571575 |
| PTPN12   | 1.211097998 | 0.000683037 | 0.015932657 |
| GIT2     | 1.240155088 | 0.001007691 | 0.018505755 |
| FAM60A   | 1.301157043 | 0.000236229 | 0.011565571 |
| CPT1C    | 1.456580289 | 0.001279671 | 0.020587681 |

|           |             |             |             |
|-----------|-------------|-------------|-------------|
| FCGR2A    | 1.448493925 | 0.000498671 | 0.014019431 |
| C1orf198  | 1.614495652 | 0.001127365 | 0.019278478 |
| BEST1     | 1.497498304 | 0.001664042 | 0.023691126 |
| DAZAP2    | 1.289367209 | 0.006057398 | 0.049191659 |
| SPATA2    | 1.322701181 | 0.004829042 | 0.042605757 |
| SSPN      | 1.595561071 | 0.001183638 | 0.019775086 |
| ACTA2     | 2.214960143 | 0.0003558   | 0.012395929 |
| FAM111A   | 1.010390762 | 0.004042781 | 0.038532876 |
| LPXN      | 1.115724655 | 0.005584144 | 0.046723725 |
| MYBL1     | 1.356133861 | 0.003151331 | 0.033220352 |
| ITGAV     | 1.435400208 | 0.000123674 | 0.009595296 |
| FAM60A    | 1.21193591  | 0.000414819 | 0.013005203 |
| C19orf38  | 1.037030948 | 0.004085317 | 0.038751077 |
| WDR47     | 1.143921772 | 0.00340153  | 0.034565756 |
| ETS1      | 1.934707291 | 0.000311432 | 0.012234335 |
| FGF13     | 1.585078555 | 0.005122077 | 0.044235333 |
| MYO5A     | 1.613931235 | 0.000699858 | 0.016028594 |
| LUZP1     | 1.370616622 | 0.001362177 | 0.02131051  |
| NHS       | 1.328702649 | 0.000903915 | 0.017853622 |
| TMEM51    | 1.434889911 | 0.000126864 | 0.009595296 |
| SERPINE2  | 1.300643371 | 0.003794629 | 0.037049806 |
| PIK3R5    | 1.973344534 | 0.002280293 | 0.027727494 |
| TNFSF13B  | 1.247704814 | 0.001879419 | 0.025312214 |
| TPM4      | 1.524083799 | 0.000251282 | 0.01169459  |
| TRAFD1    | 1.232433016 | 0.000410327 | 0.013005203 |
| SLFN12L   | 1.816113174 | 0.004181652 | 0.039304317 |
| PLAU      | 1.879142572 | 0.000769385 | 0.016486247 |
| SCRN1     | 1.589552866 | 0.002672041 | 0.030082371 |
| CCR1      | 2.409687096 | 9.82E-06    | 0.004370993 |
| PLCL2     | 1.01571436  | 0.002009945 | 0.026170303 |
| PDE6B     | 1.474148921 | 0.001627258 | 0.023379377 |
| KIAA0226  | 1.652226902 | 0.000134497 | 0.0097252   |
| AP2B1     | 1.624658495 | 0.001068364 | 0.018950239 |
| MX1       | 1.363284974 | 0.00492924  | 0.043073118 |
| ANK2      | 2.78450837  | 0.00213176  | 0.026965312 |
| TNFRSF17  | 1.593446512 | 0.005743088 | 0.047553723 |
| CASP1     | 2.414702908 | 4.29E-05    | 0.007335659 |
| CBR3      | 1.036629203 | 0.005743901 | 0.047553723 |
| CD27      | 1.96889384  | 1.28E-05    | 0.004370993 |
| CCDC154   | 1.0911933   | 0.001387041 | 0.021567279 |
| BTN3A1    | 1.917705519 | 0.000112873 | 0.009156966 |
| BTN3A1    | 1.770599787 | 2.39E-05    | 0.006193459 |
| LOC375190 | 1.954773116 | 0.001480736 | 0.022344068 |
| SEC14L1   | 1.035399408 | 0.001107073 | 0.019186762 |

|          |             |             |             |
|----------|-------------|-------------|-------------|
| PRDM1    | 1.321015421 | 0.000320307 | 0.012254849 |
| LDB2     | 1.083284805 | 0.002473508 | 0.028922764 |
| CD68     | 1.439556663 | 0.000111797 | 0.009156966 |
| DPYSL2   | 1.480287604 | 0.000147025 | 0.010072696 |
| DOK1     | 1.950389434 | 0.00024362  | 0.011672752 |
| ITGAM    | 1.464657444 | 3.75E-05    | 0.007028513 |
| FRZB     | 2.192739769 | 0.004349224 | 0.040123708 |
| IGFBP7   | 1.342148535 | 6.24E-05    | 0.008053145 |
| ANXA5    | 1.182345024 | 6.59E-05    | 0.008063947 |
| BIRC3    | 1.998261093 | 0.001774187 | 0.024504666 |
| CLIC1    | 1.081457011 | 0.003280751 | 0.033897042 |
| FABP5    | 2.112100338 | 0.000204039 | 0.011049475 |
| FYB      | 2.185361569 | 6.68E-06    | 0.004134628 |
| ADRBK1   | 1.732373229 | 0.000875562 | 0.017646068 |
| ALOX5AP  | 1.774828924 | 0.000630851 | 0.015260028 |
| CLIC2    | 2.351115001 | 0.000225706 | 0.011445469 |
| ID4      | 1.740069029 | 0.000459174 | 0.013481053 |
| CX3CR1   | 2.047468999 | 0.000352925 | 0.012360149 |
| DKC1     | 1.187459066 | 0.002526749 | 0.029243826 |
| AIF1     | 2.109347059 | 8.44E-05    | 0.00872223  |
| GSTA4    | 1.258667809 | 0.001533486 | 0.022715011 |
| IL18     | 1.44496195  | 0.000927328 | 0.017880184 |
| ACTG1    | 1.003377789 | 0.001540523 | 0.022741371 |
| CD33     | 1.492959726 | 0.00102663  | 0.01857039  |
| CXCL1    | 3.487224693 | 4.92E-05    | 0.00771961  |
| GTF3C2   | 1.039929325 | 0.001463996 | 0.022211915 |
| ATP6V1E1 | 1.120048771 | 0.002065434 | 0.026507793 |
| CD34     | 1.493160572 | 0.003248972 | 0.033797574 |
| FLII     | 1.111899049 | 0.001084512 | 0.01901645  |
| ACTA2    | 1.829374499 | 0.001852522 | 0.025080302 |
| CDH4     | 1.405627323 | 0.004325954 | 0.040049374 |
| AOAH     | 1.983938711 | 0.000920319 | 0.017877478 |
| CRYAB    | 1.346579068 | 0.002859814 | 0.03130615  |
| EMR1     | 2.021625255 | 0.001247512 | 0.020340824 |
| ETV6     | 1.147270223 | 0.002999688 | 0.032300433 |
| AXL      | 1.402079078 | 0.000373279 | 0.012603013 |
| CAPN2    | 1.433212693 | 0.00024848  | 0.01169459  |
| 7-Sep    | 1.3378666   | 8.29E-05    | 0.00872223  |
| C5AR1    | 1.275573387 | 0.001924704 | 0.025565886 |
| CTGF     | 2.340791066 | 7.01E-05    | 0.008226635 |
| EZH1     | 1.63364527  | 0.002739766 | 0.030515587 |
| CD1B     | 1.656769102 | 0.000457567 | 0.013481053 |
| COL4A1   | 1.558648199 | 0.003126059 | 0.033068194 |
| GRB2     | 1.197371477 | 0.000613652 | 0.015131243 |

|          |             |             |             |
|----------|-------------|-------------|-------------|
| HCK      | 2.473316793 | 0.000160927 | 0.010338219 |
| HLA-DOA  | 2.595534254 | 9.81E-05    | 0.008864474 |
| HLA-DOB  | 1.882425808 | 0.004768759 | 0.042219853 |
| FPR3     | 1.555755094 | 0.000179021 | 0.010584994 |
| HLA-DPB1 | 1.926517264 | 6.60E-05    | 0.008063947 |
| CD48     | 1.767332499 | 0.001702959 | 0.023895361 |
| CD79A    | 2.312709515 | 0.000824276 | 0.017084696 |
| CTNNA1   | 1.18959427  | 0.000426742 | 0.013045227 |
| CTSC     | 1.813256025 | 9.60E-05    | 0.008828413 |
| DARC     | 3.204889294 | 0.000418516 | 0.013005203 |
| CD72     | 2.992564713 | 1.12E-05    | 0.004370993 |
| CD52     | 1.8669251   | 0.001338407 | 0.021051553 |
| EFNA5    | 2.259562194 | 0.000382972 | 0.012777971 |
| CEACAM3  | 1.648271732 | 0.000102637 | 0.008993312 |
| FPR1     | 1.669893463 | 0.000113924 | 0.009156966 |
| GNAI2    | 1.168607227 | 0.004213966 | 0.039431204 |
| HK3      | 1.169189275 | 0.002249363 | 0.027531776 |
| TNC      | 2.080758235 | 0.001164244 | 0.019579251 |
| KCNN3    | 1.979400576 | 0.000617864 | 0.015131243 |
| KPNA2    | 1.344688074 | 0.00148641  | 0.022362968 |
| LAMB1    | 1.008649449 | 0.000877848 | 0.017658338 |
| MAP4     | 1.105824862 | 0.001981095 | 0.025993599 |
| MX2      | 1.715244855 | 0.005318175 | 0.045315471 |
| IL3RA    | 1.308934098 | 0.002277025 | 0.027705534 |
| ITGAV    | 1.411366357 | 0.000312321 | 0.012234335 |
| KCNJ10   | 1.798454493 | 0.003306783 | 0.034045019 |
| TNPO1    | 1.07254664  | 0.001085137 | 0.01901645  |
| LYN      | 2.352366739 | 0.000107508 | 0.009156966 |
| MEF2C    | 1.346551606 | 0.001511245 | 0.022576581 |
| MX1      | 1.377201447 | 6.41E-05    | 0.008063947 |
| ITPKB    | 1.846068741 | 0.005933555 | 0.048514002 |
| ME2      | 1.712713346 | 0.003839948 | 0.037338644 |
| MNDA     | 1.752449742 | 0.004861067 | 0.042795839 |
| MRC1     | 1.290699111 | 0.000620071 | 0.015142776 |
| ITGA3    | 2.020717671 | 0.001154904 | 0.019502504 |
| ITPR1    | 1.44369893  | 0.001029238 | 0.01857907  |
| HMOX1    | 2.013577197 | 0.000162364 | 0.01036584  |
| IL7R     | 1.338297026 | 0.003258538 | 0.033853372 |
| KLRD1    | 1.548511467 | 0.001534832 | 0.022715011 |
| PDGFA    | 2.192133287 | 0.000555344 | 0.014663262 |
| PFKP     | 1.779783902 | 0.00013292  | 0.00971712  |
| ITPR3    | 2.532800657 | 0.000884997 | 0.017713823 |
| KLRB1    | 2.021974609 | 0.00075485  | 0.016486247 |
| LDHB     | 1.1749894   | 0.00216525  | 0.027171364 |

|         |             |             |             |
|---------|-------------|-------------|-------------|
| MSN     | 1.214972473 | 0.000301739 | 0.012141407 |
| OAS2    | 1.186953139 | 0.005882514 | 0.048290071 |
| PDE7A   | 1.408121377 | 0.000751772 | 0.016486135 |
| LCP1    | 1.888082463 | 0.002125879 | 0.02692428  |
| LTF     | 1.247971192 | 0.00558303  | 0.046723725 |
| MARCKS  | 2.160477447 | 0.000135259 | 0.0097252   |
| MYH9    | 1.109727444 | 0.000606767 | 0.015107025 |
| P2RX5   | 1.852833913 | 0.000617105 | 0.015131243 |
| PLEK    | 2.276450499 | 0.000806844 | 0.016929618 |
| PRKAR1B | 1.404611863 | 0.000158462 | 0.01030305  |
| PSMB9   | 2.146943086 | 0.000238294 | 0.011579575 |
| PTPN1   | 1.269832702 | 0.00029071  | 0.012095493 |
| RAC2    | 1.870556271 | 0.001904687 | 0.025399147 |
| SRGN    | 1.286406744 | 0.000370289 | 0.012603013 |
| PTPRC   | 2.113197043 | 0.000296358 | 0.012102504 |
| PTX3    | 3.337163615 | 0.000359595 | 0.012443221 |
| RNASE1  | 2.074101459 | 4.89E-05    | 0.00771961  |
| OAS1    | 1.023878511 | 0.005704888 | 0.047384459 |
| PDGFB   | 1.260748878 | 0.001413645 | 0.021775325 |
| SORT1   | 1.505352281 | 0.004732081 | 0.042040979 |
| PDE6D   | 1.094253031 | 0.005991012 | 0.048846849 |
| CXCL6   | 2.562265928 | 3.46E-05    | 0.007011546 |
| SOD3    | 1.203396919 | 0.004424858 | 0.040510267 |
| STXBP1  | 1.333229756 | 0.000627235 | 0.015227949 |
| RGS2    | 1.804770633 | 0.003880267 | 0.03765892  |
| RGS10   | 1.807133837 | 5.95E-05    | 0.008053145 |
| S100A8  | 2.011313551 | 0.001168109 | 0.019628078 |
| PIK3CG  | 1.759317615 | 1.04E-05    | 0.004370993 |
| MAPK11  | 1.191755249 | 0.003012195 | 0.032383872 |
| RENB    | 1.458167348 | 0.005436383 | 0.04605016  |
| PRELP   | 1.763488124 | 0.003664734 | 0.036076943 |
| SFRP1   | 1.242871575 | 0.003689044 | 0.036147402 |
| PTPN12  | 1.550675089 | 0.000615537 | 0.015131243 |
| TPM4    | 1.703017209 | 7.98E-05    | 0.008717971 |
| CCL5    | 1.630193783 | 0.003195336 | 0.033454343 |
| TIMP2   | 1.587836172 | 0.000339746 | 0.012254849 |
| TFF3    | 2.47744076  | 0.000266059 | 0.011911963 |
| VASP    | 1.44713072  | 0.000294379 | 0.012102504 |
| ZNF267  | 1.32304405  | 0.000896156 | 0.017780295 |
| TDG     | 1.607013985 | 0.000535868 | 0.0143951   |
| SELPLG  | 1.409068995 | 0.002388419 | 0.028349975 |
| THBS2   | 1.496149424 | 0.000119839 | 0.009519964 |
| VCL     | 1.633390671 | 0.000528558 | 0.014292776 |
| TEAD4   | 1.437828356 | 2.31E-06    | 0.002615405 |

|          |             |             |             |
|----------|-------------|-------------|-------------|
| TRIM21   | 1.225059325 | 0.000434459 | 0.013136157 |
| UCP2     | 1.691090038 | 0.001182473 | 0.019771804 |
| TCF21    | 3.342375921 | 5.20E-05    | 0.007824954 |
| TGFBR3   | 1.094789253 | 0.005395517 | 0.045851259 |
| TGFBR2   | 1.092192792 | 0.001676082 | 0.023730166 |
| TLR1     | 1.835924235 | 0.000198953 | 0.011049198 |
| TYROBP   | 1.239393865 | 0.001397054 | 0.021636005 |
| SLC25A12 | 1.165880727 | 0.000134448 | 0.0097252   |
| SMARCA5  | 1.632120896 | 0.000229246 | 0.011445469 |
| RNASET2  | 1.255792861 | 0.003558948 | 0.035512946 |
| GPR68    | 1.271317451 | 0.001248161 | 0.020340824 |
| DYSF     | 1.310619362 | 0.002429205 | 0.028599867 |
| SNN      | 1.43183123  | 5.60E-05    | 0.008027439 |
| PEA15    | 1.256958818 | 0.001000219 | 0.018471549 |
| NSMAF    | 1.299234371 | 0.000262392 | 0.011799544 |
| CXCR4    | 1.573302479 | 0.000889639 | 0.01771828  |
| CDC7     | 2.194452094 | 0.000514102 | 0.014145023 |
| MAP4K3   | 1.312637004 | 0.001093249 | 0.019064259 |
| ITGA8    | 3.535763696 | 0.000755855 | 0.016486247 |
| B3GALT4  | 1.558969434 | 0.000627288 | 0.015227949 |
| PPM1D    | 1.029031332 | 0.002816619 | 0.031016233 |
| NRP1     | 1.265335592 | 0.001210471 | 0.020026719 |
| RPS6KA4  | 1.248325754 | 0.001129362 | 0.019278478 |
| NDST2    | 1.013690463 | 0.002792959 | 0.030872251 |
| SIGLEC5  | 1.779565402 | 0.00206866  | 0.026507793 |
| IQGAP1   | 1.799681955 | 0.000166303 | 0.010479165 |
| CD84     | 1.887495032 | 0.000279852 | 0.012003271 |
| IFITM1   | 1.031998489 | 0.004588424 | 0.041450121 |
| CTSS     | 1.076828383 | 0.00308821  | 0.032862276 |
| SAP30    | 1.003727799 | 0.00201622  | 0.026193636 |
| FABP3    | 1.041025954 | 0.004111119 | 0.038911729 |
| FGF12    | 1.763389402 | 0.004029389 | 0.038495091 |
| SLC7A7   | 2.24914389  | 3.64E-05    | 0.007011546 |
| GNG11    | 1.704147892 | 0.00014529  | 0.010072696 |
| EFEMP1   | 2.67296788  | 1.27E-05    | 0.004370993 |
| FCER1G   | 1.462416637 | 0.000310467 | 0.012234335 |
| SKAP2    | 1.936576335 | 0.00041329  | 0.013005203 |
| WARS     | 2.027806955 | 4.38E-06    | 0.003192872 |
| GYG1     | 1.486926859 | 0.001698707 | 0.023884852 |
| SERPINB9 | 2.320271056 | 1.19E-05    | 0.004370993 |
| ETV5     | 1.21138056  | 0.000997009 | 0.018471549 |
| P2RY6    | 3.000988729 | 0.001345556 | 0.021135344 |
| UBE2L6   | 1.608801083 | 1.14E-05    | 0.004370993 |
| ATP2A1   | 1.564039298 | 0.000394349 | 0.012854122 |

|         |             |             |             |
|---------|-------------|-------------|-------------|
| KLF4    | 1.876969218 | 0.003387    | 0.034471085 |
| COL12A1 | 1.936983428 | 4.04E-05    | 0.007183485 |
| ERG     | 1.505535803 | 0.000424405 | 0.013045227 |
| GNA14   | 1.026648315 | 0.003788807 | 0.037010658 |
| ARRB1   | 1.15740358  | 0.003219368 | 0.033639691 |
| C3AR1   | 1.241718211 | 4.66E-05    | 0.007487582 |
| DACH1   | 1.747666138 | 0.003096227 | 0.032871847 |
| DUSP8   | 2.004771999 | 0.000142384 | 0.009971142 |
| FRG1    | 1.1381089   | 0.002179668 | 0.027219455 |
| CRABP1  | 3.136579696 | 0.000149782 | 0.010125656 |
| EPHA7   | 1.638967021 | 0.002063849 | 0.026507793 |
| BST1    | 1.194256386 | 0.001064356 | 0.018917117 |
| ASAH1   | 1.4267586   | 0.004989243 | 0.043455798 |
| MEOX1   | 2.498502966 | 0.00016097  | 0.010338219 |
| ITGBL1  | 1.814301932 | 0.002321371 | 0.027880924 |
| CNN2    | 1.289545051 | 0.000279317 | 0.012003271 |
| VCAN    | 1.753311795 | 0.000583048 | 0.014912856 |
| KIF2A   | 1.233405431 | 0.002212467 | 0.02732591  |
| NFKBIE  | 1.021863646 | 0.002658167 | 0.029949851 |
| B4GALT5 | 1.529702015 | 0.000211061 | 0.011243021 |
| KIF5B   | 1.058917358 | 0.00179099  | 0.02460588  |
| SPTLC2  | 2.141864131 | 0.000118771 | 0.009471953 |
| MMP9    | 1.424275108 | 0.000865946 | 0.017493386 |
| AIF1    | 2.067264714 | 0.000203657 | 0.011049475 |
| SPARCL1 | 1.59278004  | 0.003539657 | 0.035410497 |
| GRAP2   | 1.521313159 | 0.003381912 | 0.034436462 |
| DOCK2   | 2.771719491 | 7.49E-06    | 0.004367778 |
| C1orf38 | 1.797222298 | 0.002025753 | 0.026193636 |
| ACTN4   | 1.17326047  | 0.003131981 | 0.033113681 |
| JARID2  | 1.157173612 | 0.005274134 | 0.045147472 |
| MTA2    | 1.779230154 | 0.000114676 | 0.009181261 |
| NRXN3   | 1.641140654 | 0.004195484 | 0.039381607 |
| LPXN    | 1.485412749 | 0.001791925 | 0.02460588  |
| ARHGEF6 | 1.955444216 | 0.000125494 | 0.009595296 |
| SLC4A3  | 1.162326474 | 0.003489316 | 0.035092554 |
| ANXA3   | 2.034794024 | 0.002696821 | 0.030242329 |
| COL8A2  | 2.054197971 | 0.00300985  | 0.032375713 |
| CTNS    | 1.166369668 | 0.00052543  | 0.014288541 |
| ADRBK2  | 2.331338026 | 0.000471247 | 0.013629768 |
| CLEC2B  | 1.875630758 | 0.00149151  | 0.022406672 |
| ETS1    | 1.133956041 | 0.005442743 | 0.04605016  |
| S1PR3   | 1.243436813 | 0.003352442 | 0.034238845 |
| CREB5   | 1.347833074 | 0.002958779 | 0.031995595 |
| PIK3CD  | 1.019721628 | 0.00455219  | 0.041286843 |

|          |             |             |             |
|----------|-------------|-------------|-------------|
| PRKX     | 1.629448541 | 0.000423547 | 0.013045227 |
| CBFA2T3  | 1.277539419 | 0.004199827 | 0.039404262 |
| GMFG     | 2.386359363 | 7.54E-05    | 0.008554709 |
| MECP2    | 1.229576699 | 0.001020366 | 0.018564781 |
| SSPN     | 1.600161207 | 0.002900555 | 0.031616516 |
| GPR34    | 1.733786942 | 0.001636074 | 0.023456526 |
| VAV1     | 1.634113615 | 0.00131419  | 0.020896026 |
| HCLS1    | 1.26483665  | 0.00566767  | 0.047171283 |
| NR5A1    | 3.351102705 | 0.005701021 | 0.047381356 |
| MVP      | 1.057883702 | 0.001582113 | 0.023049488 |
| PIP4K2A  | 1.848945884 | 9.10E-05    | 0.00872223  |
| CBFA2T2  | 1.070536438 | 0.00526101  | 0.045091845 |
| CXCL11   | 1.924398072 | 0.000791073 | 0.016692777 |
| SRC      | 1.71813117  | 0.00031368  | 0.012240716 |
| GPR15    | 1.309427389 | 0.005809901 | 0.047869821 |
| GRK5     | 1.170877414 | 0.003179148 | 0.03335328  |
| PTPN14   | 1.991003653 | 0.004896263 | 0.04293905  |
| GNPDA1   | 1.555755222 | 8.34E-05    | 0.00872223  |
| HLA-E    | 1.116156812 | 0.001482243 | 0.022349687 |
| GEM      | 1.85675129  | 0.000787071 | 0.016664319 |
| SH2B3    | 1.204811464 | 0.001937918 | 0.025641305 |
| ITGAD    | 1.537607156 | 0.001669904 | 0.023716253 |
| PIGK     | 1.369437978 | 0.000144188 | 0.010046894 |
| HSPG2    | 1.01196489  | 0.002851689 | 0.03125108  |
| SLCO2A1  | 1.193714889 | 0.001614057 | 0.023255182 |
| TRAF1    | 1.614547516 | 0.000150661 | 0.01013002  |
| ISLR     | 1.784363967 | 0.000934454 | 0.01793028  |
| LMO2     | 1.379124373 | 0.000940579 | 0.01799706  |
| LCK      | 1.690015581 | 0.000536955 | 0.014398436 |
| IFI27    | 2.429142069 | 5.69E-05    | 0.008053145 |
| IFI16    | 1.873698222 | 1.17E-05    | 0.004370993 |
| LCP2     | 1.751009012 | 0.002105328 | 0.026770096 |
| SLC1A5   | 1.22683116  | 0.002563083 | 0.029497124 |
| ACTR2    | 1.113703561 | 0.000371484 | 0.012603013 |
| MAFB     | 1.631813963 | 0.003666629 | 0.036076943 |
| ABI2     | 1.270938926 | 0.001912936 | 0.025475861 |
| NKG7     | 1.530813423 | 0.002878621 | 0.031495138 |
| STX6     | 1.490375713 | 0.000916156 | 0.017877478 |
| SMC4     | 1.636676599 | 0.000574965 | 0.014877663 |
| S100A11  | 1.029914799 | 0.005977645 | 0.04878452  |
| ARPC1B   | 1.109150523 | 0.002889694 | 0.031565543 |
| PTPRCAP  | 1.519332138 | 0.000830567 | 0.01715383  |
| S100A12  | 1.998978335 | 0.001672189 | 0.023716253 |
| NAALADL1 | 1.383402516 | 0.003047075 | 0.032604344 |

|          |             |             |             |
|----------|-------------|-------------|-------------|
| CD180    | 1.536766415 | 0.004645765 | 0.041737459 |
| LGMN     | 1.266936634 | 0.003170702 | 0.033298891 |
| MICB     | 1.602699512 | 0.002358571 | 0.028151978 |
| SMNDC1   | 1.246677216 | 0.001743038 | 0.024307287 |
| IFNGR2   | 1.279726514 | 0.000155285 | 0.010188496 |
| ARL4C    | 1.868684197 | 0.001239379 | 0.020340164 |
| MRC2     | 1.749474139 | 0.000254701 | 0.01169459  |
| MAP3K1   | 1.142848976 | 0.000618495 | 0.015131243 |
| RNASE6   | 1.271102491 | 0.001569011 | 0.022929794 |
| SDCBP    | 1.107097545 | 0.004179091 | 0.039304317 |
| EFS      | 1.449295087 | 0.000424601 | 0.013045227 |
| MFGE8    | 1.105316965 | 0.004247249 | 0.039572439 |
| PIAS3    | 1.28726861  | 0.002608203 | 0.029665221 |
| CWC27    | 1.384062088 | 0.000701847 | 0.016028594 |
| CAPZA1   | 1.000488093 | 0.001769519 | 0.024504666 |
| SIRPB1   | 1.882538105 | 9.25E-05    | 0.008734636 |
| HLA-DMA  | 1.59531171  | 7.83E-05    | 0.008717971 |
| MPHOSPH6 | 1.242557419 | 0.004216715 | 0.039435845 |
| IGSF6    | 2.264234185 | 0.000147715 | 0.010086148 |
| RGS19    | 2.27733418  | 0.000366985 | 0.01259222  |
| TNFAIP2  | 1.457940008 | 0.000238724 | 0.011579575 |
| CD5L     | 2.126278276 | 0.001825099 | 0.024857388 |
| TUBB4    | 2.958549389 | 0.000396337 | 0.012854122 |
| PPP1R2   | 1.235342262 | 0.002034286 | 0.026252837 |
| FBLN5    | 2.228524976 | 0.002853253 | 0.03125108  |
| TUBA1A   | 1.266875777 | 0.000920183 | 0.017877478 |
| IRF9     | 1.247024961 | 0.001932441 | 0.025605119 |
| TLN1     | 1.068236134 | 0.001115273 | 0.019249515 |
| MERTK    | 1.408666686 | 0.001147866 | 0.019448002 |
| TAX1BP1  | 1.163504167 | 0.005846466 | 0.04805211  |
| SPATA2   | 1.471622921 | 0.001874395 | 0.025292569 |
| PDE4A    | 1.532320533 | 0.000302703 | 0.012141407 |
| LRMP     | 1.564067036 | 0.005562822 | 0.0466569   |
| STK4     | 1.230401188 | 0.00046473  | 0.013533993 |
| TRIM22   | 2.364725888 | 4.96E-07    | 0.001836216 |
| OAS3     | 1.195583797 | 0.001970031 | 0.025881694 |
| HCAR3    | 2.751799877 | 0.001290729 | 0.020700334 |
| NOD1     | 1.623323638 | 0.002217083 | 0.027349832 |
| SERPINE2 | 1.550495317 | 0.001011183 | 0.018505755 |
| PNOC     | 1.497930605 | 0.000216142 | 0.011343834 |
| GZMA     | 1.751528264 | 0.000602798 | 0.015063312 |
| PDGFRA   | 1.633739203 | 0.000213193 | 0.011305342 |
| ENPP2    | 1.38801596  | 0.000206474 | 0.011102961 |
| IFI30    | 1.111336674 | 0.000713673 | 0.016176355 |

|         |             |             |             |
|---------|-------------|-------------|-------------|
| SEMA3C  | 3.225504164 | 0.000228326 | 0.011445469 |
| CXCL13  | 2.474319884 | 0.002466986 | 0.028896154 |
| TYRO3   | 1.453186325 | 0.000395918 | 0.012854122 |
| MCAM    | 2.273374696 | 0.000832193 | 0.01715383  |
| CD226   | 1.515395797 | 0.002700394 | 0.030242329 |
| TESK1   | 1.633155235 | 0.002238667 | 0.027460704 |
| NES     | 2.103932481 | 0.002128371 | 0.02693913  |
| BAIAP2  | 1.684901743 | 0.000751642 | 0.016486135 |
| MAP4K5  | 1.105347286 | 0.000489496 | 0.013879943 |
| CFDP1   | 1.009084211 | 0.00077037  | 0.016486247 |
| SEMA4D  | 2.250627799 | 0.00055546  | 0.014663262 |
| PTPRE   | 2.719253364 | 4.08E-06    | 0.003192872 |
| DNAJB4  | 1.690524269 | 0.000964156 | 0.018192427 |
| CAP1    | 1.550183845 | 0.000175075 | 0.010584994 |
| IFI44   | 1.417761393 | 0.00010004  | 0.008944329 |
| GNAI3   | 1.276769197 | 4.15E-05    | 0.007249745 |
| HCP5    | 1.813001603 | 0.000302441 | 0.012141407 |
| FGL2    | 2.601865536 | 0.000101907 | 0.008967806 |
| NEDD9   | 1.708743715 | 0.000151831 | 0.01013002  |
| LAPTM5  | 1.628991826 | 0.000770321 | 0.016486247 |
| CBX1    | 1.424554649 | 0.000527597 | 0.014292776 |
| BTG2    | 1.554891792 | 0.000623568 | 0.015173737 |
| DYNLT1  | 1.217810167 | 0.000351332 | 0.012360149 |
| LYVE1   | 1.573064054 | 0.000777184 | 0.016576452 |
| RAB31   | 1.536209537 | 0.000350325 | 0.012360149 |
| SLA     | 1.951555777 | 2.01E-05    | 0.005519794 |
| LILRA1  | 2.775176177 | 0.000346753 | 0.012360149 |
| UTRN    | 1.977466648 | 6.15E-05    | 0.008053145 |
| CD86    | 1.384828395 | 0.002632704 | 0.029756496 |
| PRSS23  | 1.765398769 | 1.84E-05    | 0.005361646 |
| PIM2    | 1.772381066 | 0.001355808 | 0.021243424 |
| TLE4    | 1.564572711 | 0.001208372 | 0.020026719 |
| ANGPTL2 | 2.171252921 | 0.00076971  | 0.016486247 |
| GPR182  | 1.750985643 | 0.00441304  | 0.040438344 |
| MYO9A   | 1.214131533 | 0.001592172 | 0.023119329 |
| BTN3A3  | 1.42477174  | 0.000464522 | 0.013533993 |
| BTN3A2  | 1.492864595 | 0.000238993 | 0.011579575 |
| STAT1   | 1.489993922 | 0.002743482 | 0.030520361 |
| CD300A  | 1.693601934 | 0.00033884  | 0.012254849 |
| KLRK1   | 1.568336451 | 0.002568543 | 0.029499358 |
| CIT     | 2.148453509 | 0.000137931 | 0.00984617  |
| SP140   | 1.409253212 | 0.001425873 | 0.021822053 |
| GCA     | 1.296372356 | 0.004002002 | 0.038399232 |
| EPB41L3 | 1.351563565 | 0.000821714 | 0.017073994 |

|         |             |             |             |
|---------|-------------|-------------|-------------|
| PIP5K1C | 1.081965539 | 0.001516628 | 0.022634116 |
| HNRNPH3 | 1.178750892 | 0.000544151 | 0.014499307 |
| MRAS    | 1.645850825 | 0.004629716 | 0.041638892 |
| MAPRE1  | 1.058745574 | 0.002190185 | 0.027219455 |
| PXDN    | 1.023081432 | 0.003213517 | 0.03361023  |
| DKK3    | 2.078002359 | 0.000183378 | 0.010584994 |
| GPR132  | 1.521135009 | 0.000240952 | 0.011629503 |
| DSE     | 1.52321346  | 0.000111076 | 0.009156966 |
| ARL2BP  | 1.193157144 | 0.00031281  | 0.012234335 |
| RAPGEF5 | 1.612757572 | 0.000377007 | 0.012680341 |
| STAP1   | 1.866157118 | 0.000406943 | 0.012975135 |
| TINF2   | 1.080802663 | 0.001502301 | 0.02250612  |
| PYCARD  | 1.377581484 | 0.003124191 | 0.033065567 |
| PHLDA3  | 2.057934928 | 1.35E-06    | 0.002207111 |
| FLRT2   | 1.553214104 | 0.002778214 | 0.030759227 |
| HTRA2   | 2.16484984  | 0.000113643 | 0.009156966 |
| ANP32D  | 1.058076407 | 0.00562022  | 0.046910225 |
| FHOD1   | 2.449938401 | 0.005165956 | 0.044557732 |
| PYCR2   | 1.037187761 | 0.001443429 | 0.021975426 |
| PILRA   | 1.333639239 | 5.98E-05    | 0.008053145 |
| VCL     | 1.657692019 | 8.66E-06    | 0.004370993 |
| HMHA1   | 1.443609093 | 0.002579699 | 0.029538488 |
| NXT1    | 1.044190093 | 0.002310035 | 0.027873334 |
| SSBP2   | 1.454089846 | 0.001888702 | 0.025351442 |
| ANAPC4  | 1.2388384   | 0.001869925 | 0.025248936 |
| FOXP3   | 1.228492655 | 0.005512328 | 0.046446424 |
| CD5     | 1.198396896 | 0.000538108 | 0.014398436 |
| CBX6    | 1.688333864 | 0.000912032 | 0.017877478 |
| GPR160  | 1.573818933 | 0.000559592 | 0.014710456 |
| RAB3IL1 | 1.817182378 | 0.002180564 | 0.027219455 |
| DAPK2   | 1.952781459 | 0.000388206 | 0.012836406 |
| KLRC4   | 1.787095365 | 0.002625009 | 0.029721626 |
| EVI2A   | 1.597158555 | 0.001414772 | 0.021775325 |
| SIGLEC7 | 1.362896018 | 0.000336668 | 0.012254849 |
| KCNMB4  | 1.007999757 | 0.000239351 | 0.011579575 |
| PIK3R5  | 1.549978032 | 0.000518244 | 0.014145023 |
| TNFAIP8 | 1.99454426  | 0.00139782  | 0.021636005 |
| SACS    | 2.06385438  | 0.000447212 | 0.01332889  |
| BCAR1   | 1.800519637 | 0.002434964 | 0.028636078 |
| TMOD3   | 1.132247541 | 0.001161245 | 0.019546423 |
| VGLL4   | 1.474406644 | 0.000343309 | 0.012360149 |
| HSPB8   | 2.6338619   | 0.000187529 | 0.010712144 |
| SESN1   | 1.390169773 | 0.000241588 | 0.011632712 |
| ARMCX2  | 2.134905583 | 0.000911456 | 0.017877478 |

|          |             |             |             |
|----------|-------------|-------------|-------------|
| ZEB2     | 1.673958701 | 0.001418061 | 0.021775325 |
| APOBEC3C | 1.745413153 | 0.000127743 | 0.009595296 |
| LMCD1    | 2.562224026 | 0.000272319 | 0.011960837 |
| KIAA0226 | 1.474633724 | 0.000338973 | 0.012254849 |
| DOCK10   | 1.790393026 | 0.000196949 | 0.011046469 |
| SPOCK2   | 1.1930562   | 0.002509732 | 0.029129441 |
| SIGLEC8  | 1.533234821 | 5.47E-06    | 0.003721806 |
| RNF144A  | 1.538704904 | 0.00335042  | 0.034238845 |
| KIAA0247 | 1.16791367  | 0.000108738 | 0.009156966 |
| HOXD4    | 1.392423362 | 0.005696805 | 0.04737514  |
| FAM65B   | 1.806752926 | 0.001071582 | 0.01897434  |
| SDC3     | 1.199963766 | 0.00112917  | 0.019278478 |
| ARNT2    | 1.11601801  | 0.004658535 | 0.041771995 |
| AAK1     | 1.260350708 | 0.003645612 | 0.035955951 |
| KIAA0753 | 1.292027097 | 0.00473155  | 0.042040979 |
| RABGAP1L | 1.390087769 | 0.000373571 | 0.012603013 |
| CHSY1    | 1.084044817 | 0.001355649 | 0.021243424 |
| WDFY3    | 1.243363766 | 0.001424995 | 0.021822053 |
| KIAA0355 | 1.435141379 | 0.000653111 | 0.015472375 |
| PHACTR2  | 1.853017982 | 7.90E-05    | 0.008717971 |
| DENND4B  | 1.740740008 | 0.000456611 | 0.013481053 |
| ARHGAP25 | 2.314532831 | 0.000454154 | 0.013437682 |
| SETX     | 1.201540071 | 0.000399433 | 0.012857899 |
| ENDOD1   | 2.309830451 | 5.75E-05    | 0.008053145 |
| CSTF2T   | 1.143590985 | 0.000430862 | 0.013129084 |
| GPD1L    | 1.361839691 | 0.004137371 | 0.039033531 |
| RRS1     | 1.097874412 | 0.00465192  | 0.041764993 |
| TBC1D4   | 1.001804579 | 0.001789086 | 0.02460588  |
| SEL1L3   | 1.155039362 | 0.003157973 | 0.033267894 |
| CAMTA1   | 2.354519439 | 0.005281502 | 0.045172661 |
| GLS      | 1.934644127 | 6.89E-06    | 0.00413815  |
| 6-Sep    | 1.764415976 | 0.000764657 | 0.016486247 |
| TBC1D9   | 1.08654878  | 0.000800156 | 0.016823871 |
| SASH1    | 1.607536167 | 0.000454034 | 0.013437682 |
| ZBTB39   | 1.222111349 | 0.000608166 | 0.015117199 |
| C2CD2    | 1.956392985 | 0.001625164 | 0.023365742 |
| CEP68    | 1.171638768 | 0.002275786 | 0.027705534 |
| MAU2     | 1.11446827  | 0.00295884  | 0.031995595 |
| SWAP70   | 2.328361916 | 0.000248303 | 0.01169459  |
| VPS8     | 1.317170727 | 0.003030467 | 0.032511826 |
| FNBP4    | 1.269427602 | 0.001237992 | 0.020333747 |
| SRGAP2   | 1.586312466 | 0.003667408 | 0.036076943 |
| RGL1     | 1.333554294 | 0.001579126 | 0.023049488 |
| DENND5A  | 1.210518389 | 0.000657439 | 0.015535045 |

|           |             |             |             |
|-----------|-------------|-------------|-------------|
| LEPROTL1  | 1.5596213   | 0.00124252  | 0.020340824 |
| DSTYK     | 1.2256742   | 0.000180175 | 0.010584994 |
| NFASC     | 2.614277445 | 2.86E-05    | 0.006479724 |
| PPWD1     | 1.045097299 | 0.000697197 | 0.016028594 |
| PTPN23    | 1.264103989 | 0.000129811 | 0.009694521 |
| RAB11FIP5 | 2.233538882 | 0.000321552 | 0.012254849 |
| DNAJC9    | 1.487550016 | 1.59E-05    | 0.004926141 |
| PARM1     | 2.360259941 | 0.003546324 | 0.035438933 |
| ARAP2     | 1.574425537 | 0.000764444 | 0.016486247 |
| PHF15     | 1.30475006  | 0.000461272 | 0.013481053 |
| C15orf39  | 1.609364547 | 0.000160364 | 0.010338219 |
| TES       | 1.793826081 | 9.62E-06    | 0.004370993 |
| DENND2A   | 1.471750463 | 3.25E-05    | 0.006889194 |
| EP400     | 1.119235739 | 0.002905563 | 0.031648593 |
| GIMAP2    | 1.659264051 | 0.000697768 | 0.016028594 |
| DFNB31    | 2.146450616 | 8.68E-05    | 0.00872223  |
| SIPA1L1   | 1.148647654 | 0.001711943 | 0.023955466 |
| PPP1R16B  | 1.071313452 | 0.004190648 | 0.039354314 |
| LY96      | 1.968179289 | 1.51E-05    | 0.004903772 |
| DKK3      | 2.718529795 | 2.72E-05    | 0.006427112 |
| RHD       | 1.165735432 | 0.002569052 | 0.029499358 |
| MOXD1     | 1.658825371 | 1.40E-05    | 0.004612159 |
| CHST15    | 1.62943178  | 0.000287052 | 0.012083406 |
| RIMBP3    | 1.694584134 | 0.003541602 | 0.035410497 |
| PALLD     | 2.655724976 | 8.42E-05    | 0.00872223  |
| NUB1      | 1.403132924 | 0.001774902 | 0.024504666 |
| ZNF107    | 1.001044988 | 0.003498961 | 0.03517222  |
| ARRDC2    | 1.102171224 | 0.003654244 | 0.036023678 |
| RARB      | 1.277049258 | 0.005891497 | 0.048306259 |
| COMMD10   | 1.239793103 | 0.001057379 | 0.018853665 |
| WSB1      | 1.091701766 | 0.004127993 | 0.038999125 |
| C1QA      | 1.577758075 | 8.89E-05    | 0.00872223  |
| KIAA1279  | 1.337459167 | 0.000293911 | 0.012102504 |
| HDGFRP3   | 1.249867647 | 0.001674146 | 0.023719197 |
| BIN2      | 2.024605632 | 0.001506512 | 0.022532557 |
| UBR5      | 1.166753011 | 0.004497932 | 0.040977143 |
| TAOK2     | 1.077192001 | 0.004121523 | 0.038956025 |
| WBP5      | 1.745369008 | 1.90E-05    | 0.005456676 |
| MZB1      | 1.420310417 | 0.006105199 | 0.049412907 |
| ZCCHC17   | 1.289558527 | 0.001305074 | 0.020787074 |
| OAS2      | 1.801329777 | 8.43E-06    | 0.004370993 |
| PLEKHO1   | 1.840612696 | 0.000629099 | 0.015240915 |
| ARID4B    | 1.144568124 | 0.000251437 | 0.01169459  |
| CRIM1     | 1.256388621 | 0.000371818 | 0.012603013 |

|          |             |             |             |
|----------|-------------|-------------|-------------|
| RAB8B    | 1.398834977 | 0.000229766 | 0.011445469 |
| DACT1    | 1.588510566 | 0.005752423 | 0.047604976 |
| GDPD2    | 3.253207458 | 0.000459331 | 0.013481053 |
| NRN1     | 1.128942548 | 0.003874308 | 0.037629817 |
| PLCE1    | 2.258244752 | 0.000881177 | 0.017672005 |
| ABI3     | 1.249633784 | 0.002165939 | 0.027171364 |
| KLHL3    | 1.201453782 | 0.004086404 | 0.038751077 |
| MIER2    | 1.620132473 | 0.003035408 | 0.032513578 |
| KIF21B   | 1.832680958 | 0.000132209 | 0.00971712  |
| GOLM1    | 1.702904973 | 2.58E-05    | 0.006277875 |
| ARMCX3   | 1.238227228 | 0.00323678  | 0.033732572 |
| XAF1     | 1.024630402 | 0.003273408 | 0.03387222  |
| RTEL1    | 1.411767398 | 0.005081553 | 0.044008348 |
| EPDR1    | 2.053244704 | 3.03E-06    | 0.00313707  |
| PCDH12   | 1.742638896 | 0.002184448 | 0.027219455 |
| SAMD9    | 1.939320288 | 0.00017814  | 0.010584994 |
| TMCO3    | 1.457455885 | 0.000843134 | 0.017306885 |
| GALNT7   | 1.698846237 | 0.001288174 | 0.020691862 |
| FAM46C   | 1.728591246 | 0.000291699 | 0.012095493 |
| 1-Mar    | 2.753251267 | 1.04E-05    | 0.004370993 |
| DDX60    | 1.389511656 | 3.01E-05    | 0.006611088 |
| ARGLU1   | 1.212686117 | 0.000678758 | 0.015891654 |
| CCDC88A  | 1.209021602 | 0.002157697 | 0.027125337 |
| PARVA    | 1.213700838 | 0.000613101 | 0.015131243 |
| OSBPL10  | 1.635659729 | 0.002603887 | 0.029649171 |
| MED9     | 1.133205989 | 0.003077506 | 0.03279566  |
| SLFN12   | 1.699986518 | 0.000368226 | 0.012603013 |
| TMEM132A | 2.066306719 | 5.62E-05    | 0.008027439 |
| GPATCH2  | 1.483051816 | 0.000653271 | 0.015472375 |
| RASIP1   | 1.861255982 | 0.000219073 | 0.011351772 |
| LPCAT2   | 1.314634501 | 0.000644682 | 0.01543005  |
| CCDC109B | 1.722783025 | 0.000746921 | 0.01645871  |
| RNF111   | 1.017184056 | 0.005253574 | 0.045047023 |
| C1orf56  | 1.099341811 | 0.002567732 | 0.029499358 |
| RAB20    | 1.401557178 | 0.001582252 | 0.023049488 |
| PLEKHB2  | 1.544893749 | 0.000425833 | 0.013045227 |
| VPS13C   | 1.426430129 | 0.002915443 | 0.031694188 |
| C9orf167 | 1.724519828 | 0.000123317 | 0.009595296 |
| HERC6    | 1.093707823 | 0.003407169 | 0.034565756 |
| PNRC2    | 1.102461908 | 0.001083768 | 0.01901645  |
| RIF1     | 1.037874036 | 0.003350567 | 0.034238845 |
| NECAP2   | 1.336888613 | 0.000711816 | 0.016176355 |
| FAR2     | 1.258845304 | 0.001554609 | 0.022822466 |
| SMG8     | 1.030796528 | 0.000915889 | 0.017877478 |

|            |             |             |             |
|------------|-------------|-------------|-------------|
| DRAM1      | 1.369631821 | 0.000845169 | 0.017306885 |
| MIS18BP1   | 1.440085753 | 0.0032705   | 0.03387122  |
| PDP1       | 1.426140037 | 0.002386094 | 0.028349975 |
| TMEM206    | 1.401581698 | 0.000889721 | 0.01771828  |
| SOX18      | 1.428620155 | 0.001293417 | 0.020710903 |
| EXOC1      | 1.041160217 | 0.005810218 | 0.047869821 |
| HMG20A     | 1.023533615 | 0.00594413  | 0.048542141 |
| EXOC2      | 1.747518237 | 8.66E-05    | 0.00872223  |
| SLC25A36   | 1.408319442 | 0.00494902  | 0.043197604 |
| C7orf43    | 1.158904955 | 0.00187842  | 0.025312214 |
| BRF2       | 1.263121256 | 0.000632421 | 0.015279901 |
| AJAP1      | 2.102104636 | 0.00017976  | 0.010584994 |
| CSGALNACT2 | 1.499307191 | 0.000459958 | 0.013481053 |
| TMEM165    | 1.439335489 | 0.000815849 | 0.017031055 |
| HLA-F      | 1.35353279  | 0.005543149 | 0.046571575 |
| ARMCX6     | 1.175165741 | 0.001632426 | 0.023437139 |
| ROBO4      | 1.658813797 | 0.003331265 | 0.034159265 |
| GTPBP2     | 1.23250356  | 0.001525202 | 0.02265869  |
| GIMAP5     | 1.048570892 | 0.002344159 | 0.028069412 |
| CPVL       | 1.854185051 | 0.000109164 | 0.009156966 |
| SH3BP1     | 1.769101033 | 0.002051167 | 0.026387285 |
| SGTB       | 1.12266562  | 0.000593824 | 0.015004334 |
| EAF2       | 1.943558988 | 6.57E-05    | 0.008063947 |
| RIN2       | 1.874429855 | 3.06E-05    | 0.006646822 |
| BATF3      | 1.037137245 | 0.004654741 | 0.041771953 |
| HLA-DRA    | 1.393132822 | 0.00050353  | 0.014030957 |
| EXOC6      | 1.093901897 | 0.002835595 | 0.031157969 |
| HOXA5      | 1.480236676 | 0.004678844 | 0.041866243 |
| ZMIZ1      | 1.659878016 | 0.000280957 | 0.012003271 |
| ZDHHC13    | 1.385883681 | 0.000217536 | 0.011351772 |
| DUSP22     | 1.23026423  | 0.004141769 | 0.039056981 |
| DISC1      | 1.419187995 | 0.000997179 | 0.018471549 |
| KCTD5      | 1.199972913 | 0.001081736 | 0.01901645  |
| ABCC1      | 2.092990104 | 3.78E-06    | 0.003192872 |
| SPATA6     | 1.204413141 | 0.004615034 | 0.041549015 |
| S100A4     | 1.251747715 | 0.001248386 | 0.020340824 |
| RPRM       | 1.141382605 | 0.003550601 | 0.03546432  |
| HOXD8      | 3.014324295 | 1.41E-06    | 0.002207111 |
| CDC42SE1   | 1.215371025 | 0.004405336 | 0.040404019 |
| SUSD2      | 1.679920228 | 0.000184055 | 0.010584994 |
| SEMA3G     | 1.980423445 | 0.00132099  | 0.020971487 |
| ABCC1      | 2.455354814 | 4.78E-05    | 0.007620507 |
| TSHZ3      | 1.255887741 | 0.004573797 | 0.041391236 |
| GALNTL1    | 2.05822535  | 0.003225736 | 0.033645663 |

|          |             |             |             |
|----------|-------------|-------------|-------------|
| AMHR2    | 1.465944326 | 0.003029284 | 0.032511826 |
| ODF2L    | 1.641152166 | 0.000542669 | 0.014482531 |
| MCOLN1   | 1.530462569 | 0.000499203 | 0.014019431 |
| ZNF304   | 1.09379178  | 0.005766541 | 0.047667333 |
| VANGL2   | 1.015119109 | 0.001289367 | 0.020694747 |
| TAOK1    | 1.071591601 | 0.003611173 | 0.035756695 |
| VPS13C   | 1.685438103 | 0.000226209 | 0.011445469 |
| RNF213   | 1.879713917 | 0.000404183 | 0.012954159 |
| C15orf17 | 1.472223497 | 0.001383126 | 0.021539202 |
| RPTOR    | 1.794715663 | 0.00353197  | 0.035364733 |
| NCEH1    | 2.140400785 | 8.82E-06    | 0.004370993 |
| RNF150   | 2.081762949 | 0.000933397 | 0.01793028  |
| ADAM28   | 1.472888144 | 0.001707795 | 0.023922942 |
| SRGAP1   | 1.26450123  | 0.003009531 | 0.032375713 |
| KIAA1430 | 1.020809135 | 0.003588625 | 0.035662712 |
| ZNF462   | 1.577655129 | 0.000922492 | 0.017880184 |
| ARHGAP23 | 2.642768633 | 0.000112895 | 0.009156966 |
| WDFY4    | 1.394619119 | 0.001579777 | 0.023049488 |
| GABBR1   | 2.227954444 | 0.000565818 | 0.014734361 |
| ZBTB4    | 1.321314461 | 0.000537949 | 0.014398436 |
| PDLIM2   | 1.459939346 | 0.005299284 | 0.045248925 |
| MS4A7    | 2.28404527  | 6.68E-05    | 0.008063947 |
| ZNFX1    | 1.250980991 | 0.001941822 | 0.025665926 |
| RAP2A    | 1.852062553 | 6.14E-05    | 0.008053145 |
| SPINT2   | 1.598182554 | 0.000531099 | 0.01434249  |
| TMSB10   | 1.521839711 | 0.001261311 | 0.020461322 |
| GNB4     | 1.701574837 | 0.002594718 | 0.029610829 |
| ELTD1    | 2.399592037 | 9.79E-06    | 0.004370993 |
| NEFH     | 1.310305632 | 0.000583629 | 0.014912856 |
| NAPB     | 1.002734532 | 0.004758975 | 0.042188113 |
| SLAMF7   | 2.364774341 | 8.56E-05    | 0.00872223  |
| TRIM34   | 1.219643185 | 0.002225613 | 0.027391776 |
| HNRNPH3  | 1.077120621 | 0.002380954 | 0.028310751 |
| ITM2B    | 1.236611668 | 0.004689856 | 0.041866243 |
| SAMSN1   | 1.990114592 | 0.000270485 | 0.011960837 |
| ROBO3    | 1.741109856 | 0.001077405 | 0.01901645  |
| ZNF711   | 1.220652017 | 0.002309547 | 0.027873334 |
| MS4A1    | 1.203337933 | 0.00512026  | 0.044235333 |
| C10orf54 | 2.045064642 | 0.000167213 | 0.010504087 |
| IFI6     | 1.191538284 | 0.000857828 | 0.017357211 |
| AXL      | 1.433008956 | 0.000822748 | 0.017073994 |
| GPSM3    | 1.550853289 | 0.00028604  | 0.012065691 |
| NMNAT1   | 1.29813385  | 0.001401812 | 0.021670549 |
| BTN2A3   | 2.180206942 | 0.000108891 | 0.009156966 |

|           |             |             |             |
|-----------|-------------|-------------|-------------|
| GBGT1     | 1.235219409 | 0.004404449 | 0.040404019 |
| FAM111A   | 1.194296366 | 0.001738985 | 0.024267333 |
| HERC4     | 1.090313777 | 0.005780822 | 0.047743228 |
| ACSL4     | 1.443894502 | 0.000851876 | 0.017339878 |
| SUSD1     | 1.464567822 | 9.48E-05    | 0.008797851 |
| RASAL3    | 1.423839809 | 0.001110252 | 0.01922554  |
| IFIH1     | 1.162895541 | 0.002589038 | 0.029580638 |
| HIF3A     | 3.36482164  | 7.43E-05    | 0.008554709 |
| DCLRE1B   | 1.438921501 | 0.001151684 | 0.019496498 |
| CENPH     | 1.047943651 | 0.003726675 | 0.036473538 |
| RTP4      | 1.481993966 | 0.000533132 | 0.014363257 |
| MESDC1    | 1.513797831 | 0.00150066  | 0.02250612  |
| CCDC71    | 1.043597759 | 0.004473984 | 0.040876238 |
| SIGLEC1   | 1.236506143 | 0.00327576  | 0.033879392 |
| RASL11B   | 2.763951565 | 8.48E-05    | 0.00872223  |
| IFI6      | 1.12492531  | 0.001078157 | 0.01901645  |
| GIN3      | 1.563052458 | 0.000308124 | 0.012234335 |
| EFHD2     | 1.404603935 | 0.000649097 | 0.015456073 |
| WT1       | 2.447970502 | 0.001791992 | 0.02460588  |
| ATP8B4    | 1.232736081 | 0.001256457 | 0.020423424 |
| C1orf54   | 1.338541414 | 0.00105555  | 0.0188375   |
| C5orf23   | 1.595151876 | 0.000302427 | 0.012141407 |
| TNFAIP8L2 | 1.774479528 | 0.002848616 | 0.03125108  |
| RNF219    | 1.041414409 | 0.005789204 | 0.0477545   |
| ZSWIM4    | 1.497152574 | 3.72E-05    | 0.007024454 |
| ZNF426    | 1.253543487 | 0.002620277 | 0.029695771 |
| GPR172A   | 1.474352565 | 0.000739398 | 0.016396702 |
| RHBDF2    | 1.836545944 | 0.000139315 | 0.009910264 |
| CCDC102B  | 1.513449349 | 2.03E-05    | 0.005519794 |
| LPCAT1    | 1.949940515 | 0.000599079 | 0.015063312 |
| VEPH1     | 2.209618777 | 0.000738082 | 0.016396702 |
| TMEM43    | 1.180418305 | 6.22E-05    | 0.008053145 |
| MMRN2     | 1.686820543 | 6.63E-05    | 0.008063947 |
| CYBRD1    | 1.779040665 | 0.000254009 | 0.01169459  |
| WT1       | 2.209282669 | 0.000503453 | 0.014030957 |
| LILRA6    | 1.847741695 | 5.46E-05    | 0.007966436 |
| PEAK1     | 2.876686504 | 0.0003128   | 0.012234335 |
| BORA      | 1.085802608 | 0.002024056 | 0.026193636 |
| PSTPIP2   | 2.38716845  | 0.000385542 | 0.012777971 |
| CHODL     | 2.209494057 | 0.005463859 | 0.046171415 |
| GAL3ST4   | 1.377833269 | 0.000469136 | 0.01360493  |
| ZNF430    | 1.465226822 | 0.001621303 | 0.023326653 |
| CEP135    | 1.146501298 | 0.002309183 | 0.027873334 |
| LBH       | 2.224610145 | 4.57E-05    | 0.007487582 |

|          |             |             |             |
|----------|-------------|-------------|-------------|
| C6orf62  | 1.033695312 | 0.00188271  | 0.025334653 |
| WLS      | 1.738434094 | 8.77E-05    | 0.00872223  |
| HSPA12A  | 1.147888485 | 0.002101096 | 0.026759816 |
| TMEM156  | 1.997786503 | 9.14E-05    | 0.00872223  |
| RAI1     | 2.094097306 | 0.000125898 | 0.009595296 |
| SLC38A1  | 2.249575447 | 0.00014182  | 0.009971142 |
| ZBTB46   | 2.331879403 | 0.000721166 | 0.016245481 |
| ZBP1     | 1.635148195 | 0.000153308 | 0.010188496 |
| VOPP1    | 1.441634253 | 0.00051822  | 0.014145023 |
| TRAF3IP3 | 1.594989033 | 0.004531882 | 0.041139575 |
| FAM49A   | 1.660572    | 0.00123577  | 0.020313584 |
| PLEKHO2  | 2.017746802 | 0.001325918 | 0.020984449 |
| PLVAP    | 2.07161996  | 0.001235642 | 0.020313584 |
| TTYH3    | 1.428452224 | 2.67E-05    | 0.006406324 |
| NIPA2    | 1.032339391 | 0.000253642 | 0.01169459  |
| C12orf32 | 1.422389835 | 0.001101061 | 0.019128638 |
| ARID5B   | 1.441726552 | 0.000178596 | 0.010584994 |
| PLXNA1   | 1.432939673 | 0.0004722   | 0.013629768 |
| PITPNM3  | 2.95064319  | 0.001864721 | 0.025195335 |
| NDRG3    | 1.313419588 | 0.0060134   | 0.048990251 |
| SH3BGRL3 | 1.216043851 | 0.00074311  | 0.016426854 |
| RASSF4   | 1.121649102 | 0.004212029 | 0.039431204 |
| PPP1R12B | 1.330494327 | 0.001087861 | 0.019031509 |
| ANTXR1   | 1.566421118 | 8.94E-05    | 0.00872223  |
| GNGT2    | 1.343960672 | 0.001261795 | 0.020461322 |
| FAR1     | 2.283304541 | 0.000180159 | 0.010584994 |
| TBXAS1   | 1.718106101 | 0.000155702 | 0.010188496 |
| EPPK1    | 1.851828323 | 0.004694256 | 0.041868904 |
| BBS2     | 1.297901213 | 0.00321963  | 0.033639691 |
| HMCN1    | 1.795244619 | 0.000277791 | 0.012003271 |
| CPVL     | 2.514122237 | 5.19E-05    | 0.007824954 |
| CCR6     | 1.444987746 | 0.001333507 | 0.021029389 |
| SEMA6B   | 2.838228976 | 0.00071243  | 0.016176355 |
| CCDC115  | 1.156168865 | 0.005040509 | 0.04381563  |
| HCAR1    | 1.305461539 | 0.000629315 | 0.015240915 |
| RNF135   | 1.508529921 | 0.000686201 | 0.015956133 |
| LRRC8C   | 1.542616954 | 0.001502539 | 0.02250612  |
| AFAP1L2  | 2.900394478 | 0.001021172 | 0.018564781 |
| PPP1R9B  | 1.34706767  | 0.001025882 | 0.01857039  |
| SUCNR1   | 1.447543648 | 0.001301174 | 0.020786211 |
| PDZD4    | 1.478313545 | 0.000130109 | 0.009694521 |
| GATA2    | 2.497055806 | 0.000108313 | 0.009156966 |
| RERG     | 2.474636537 | 0.001269303 | 0.020501658 |
| ACRBP    | 1.643482835 | 0.001076992 | 0.01901645  |

|          |             |             |             |
|----------|-------------|-------------|-------------|
| EFS      | 1.275726997 | 0.002422926 | 0.028599867 |
| ACSS1    | 1.460190117 | 0.000500914 | 0.014028354 |
| AIF1     | 1.607780372 | 0.000183996 | 0.010584994 |
| PAR6D6   | 1.362190805 | 0.000756851 | 0.016486247 |
| CARD6    | 1.289555175 | 0.003668482 | 0.036076943 |
| C2orf40  | 3.119829562 | 0.000886913 | 0.01771828  |
| TCEAL3   | 1.521534191 | 0.000908411 | 0.017877478 |
| NLRP1    | 1.315856166 | 0.000436986 | 0.013140968 |
| HK1      | 1.356185842 | 0.000281033 | 0.012003271 |
| HLA-DPA1 | 1.247162354 | 0.000327348 | 0.012254849 |
| FAM129A  | 2.350285026 | 7.88E-06    | 0.004370993 |
| STON2    | 2.035132625 | 0.002588697 | 0.029580638 |
| CASP4    | 1.066599342 | 9.22E-05    | 0.008734636 |
| CARD16   | 1.716956025 | 0.001014558 | 0.018510462 |
| IGSF21   | 2.660783814 | 0.000126912 | 0.009595296 |
| PDGFA    | 2.838798653 | 1.75E-05    | 0.005329347 |
| ZNF101   | 1.021152537 | 0.003672496 | 0.036080643 |
| VPS13A   | 1.175347409 | 0.004421879 | 0.040501155 |
| SSH2     | 1.480994879 | 0.000418005 | 0.013005203 |
| PSIP1    | 1.15648218  | 0.000305525 | 0.012195229 |
| PML      | 1.50003044  | 0.002483804 | 0.028995795 |
| ADAM19   | 1.514850662 | 0.002638833 | 0.029781319 |
| SIGLEC10 | 2.267079228 | 7.50E-05    | 0.008554709 |
| HK1      | 1.252404036 | 0.002325097 | 0.027890239 |
| HK1      | 1.410012795 | 0.001656883 | 0.02362216  |
| GBP4     | 1.659780823 | 0.000518152 | 0.014145023 |
| EPSTI1   | 1.609977861 | 0.00010416  | 0.009087706 |
| CASP1    | 2.894668913 | 1.79E-06    | 0.002284534 |
| TANC1    | 1.534769295 | 0.003979066 | 0.038345116 |
| TRIM47   | 1.132532953 | 0.004596855 | 0.0414969   |
| ARHGAP18 | 1.196055163 | 0.004701233 | 0.041876252 |
| BOC      | 1.406794756 | 0.000174746 | 0.010584994 |
| CASP1    | 2.047473575 | 3.82E-05    | 0.007084621 |
| SIGLEC11 | 2.150820477 | 0.001054629 | 0.0188375   |
| ZNF300   | 1.598047962 | 0.000257764 | 0.011720495 |
| CASP1    | 2.13644278  | 5.19E-05    | 0.007824954 |
| SIGLEC12 | 2.189093001 | 0.004327704 | 0.040049374 |
| CASP7    | 1.136305217 | 0.006132698 | 0.049488207 |
| GZMH     | 1.788434682 | 0.001963706 | 0.025848503 |
| LUZP1    | 1.438353619 | 0.003376345 | 0.03441411  |
| FBXO32   | 1.472529549 | 0.000347403 | 0.012360149 |
| BTN2A1   | 1.501605005 | 0.00039992  | 0.012857899 |
| FMNL2    | 1.594240116 | 6.84E-05    | 0.008218765 |
| CYYR1    | 2.029640118 | 0.000318912 | 0.012254849 |

|           |             |             |             |
|-----------|-------------|-------------|-------------|
| VNN2      | 1.004152825 | 0.001176187 | 0.019694888 |
| GIT2      | 1.460673152 | 0.001644809 | 0.023499242 |
| RGS18     | 1.36127993  | 0.00262772  | 0.029721626 |
| PTPN6     | 1.243863277 | 0.00202112  | 0.026193636 |
| COL12A1   | 2.442464631 | 0.000291495 | 0.012095493 |
| 9-Mar     | 1.144656686 | 0.002195848 | 0.027219455 |
| FLYWCH2   | 1.790317756 | 0.000586502 | 0.014934015 |
| GBP5      | 2.650856999 | 8.37E-05    | 0.00872223  |
| UPF3B     | 1.439978219 | 0.000175053 | 0.010584994 |
| HSPA12B   | 2.050137988 | 0.00057737  | 0.014895881 |
| C20orf160 | 3.691463854 | 0.000433225 | 0.013136157 |
| PTPRE     | 2.258121144 | 0.000125349 | 0.009595296 |
| VCAM1     | 2.363358309 | 0.000469047 | 0.01360493  |
| TRIM34    | 1.53243377  | 0.000904224 | 0.017853622 |
| CD97      | 2.443475076 | 1.21E-06    | 0.002207111 |
| DACH1     | 1.581325226 | 0.002589175 | 0.029580638 |
| ATM       | 1.024572519 | 0.004016693 | 0.03844196  |
| KCTD12    | 2.162733207 | 0.000255527 | 0.01169459  |
| FAM113B   | 1.417664334 | 0.000617234 | 0.015131243 |
| PTPRC     | 1.307473255 | 0.000674685 | 0.015832616 |
| PAQR8     | 1.462187936 | 1.07E-05    | 0.004370993 |
| TTN       | 1.118224136 | 0.002499404 | 0.029110756 |
| ASNS      | 1.764892275 | 0.000774292 | 0.016535518 |
| GIMAP1    | 1.793588295 | 0.002289402 | 0.027739133 |
| ST5       | 1.097585623 | 0.00339442  | 0.034529391 |
| TLR8      | 2.340979655 | 4.06E-05    | 0.007183485 |
| TM4SF18   | 2.219790065 | 0.000338871 | 0.012254849 |
| CD200R1   | 1.032856496 | 0.003528483 | 0.035364733 |
| BATF2     | 1.442381105 | 0.004515611 | 0.041083202 |
| SESN3     | 1.603570576 | 6.66E-05    | 0.008063947 |
| DOCK11    | 1.053416408 | 0.002084379 | 0.026596677 |
| MSR1      | 1.446715446 | 0.004053183 | 0.038577987 |
| SLFN5     | 1.947616129 | 0.00041619  | 0.013005203 |
| PPM1M     | 1.440244638 | 0.0008565   | 0.017351477 |
| RPIA      | 1.333198863 | 0.005211262 | 0.044850243 |
| STAT1     | 1.725852447 | 0.000388563 | 0.012836406 |
| LRRC25    | 1.226146974 | 0.001335818 | 0.021029389 |
| HENMT1    | 1.726465049 | 0.002851744 | 0.03125108  |
| OSBPL3    | 1.551104885 | 0.003604495 | 0.035740345 |
| APOL2     | 1.087563871 | 0.000283693 | 0.012019591 |
| TRIM11    | 1.542707936 | 0.00011013  | 0.009156966 |
| ZNF439    | 1.359011157 | 0.000837697 | 0.017240341 |
| PSMB9     | 2.62567961  | 3.46E-06    | 0.003190249 |
| ZNF420    | 1.115176729 | 0.005756246 | 0.04761731  |

|               |             |             |             |
|---------------|-------------|-------------|-------------|
| C9orf25       | 1.004022047 | 0.003541743 | 0.035410497 |
| CCDC151       | 1.639530949 | 2.78E-05    | 0.006427112 |
| MAX           | 1.560866185 | 0.000918872 | 0.017877478 |
| MAX           | 1.250137109 | 0.000492442 | 0.013924795 |
| SNX6          | 1.218227403 | 0.004615653 | 0.041549015 |
| APOBEC3F      | 1.255252699 | 0.005098336 | 0.04410493  |
| EID2B         | 1.164903731 | 0.00013242  | 0.00971712  |
| IL34          | 3.10364538  | 0.004953316 | 0.043209963 |
| ZNF366        | 1.380714528 | 0.000765074 | 0.016486247 |
| GJD3          | 2.338626169 | 9.96E-05    | 0.008944329 |
| OSBPL3        | 1.014932745 | 0.005597515 | 0.046774385 |
| TPM3          | 1.09263561  | 0.001480776 | 0.022344068 |
| OSBPL7        | 1.379642374 | 0.002908155 | 0.031648593 |
| MS4A4A        | 1.576355024 | 4.66E-05    | 0.007487582 |
| PYHIN1        | 1.741439067 | 0.006075249 | 0.049276254 |
| SAMD3         | 1.441628166 | 0.003921013 | 0.037935958 |
| CHMP4C        | 1.51204285  | 0.000157882 | 0.01029815  |
| MLKL          | 1.26265079  | 0.000397527 | 0.012854122 |
| SPIC          | 2.232002075 | 0.000284358 | 0.012019591 |
| PQLC3         | 1.294339571 | 0.000982962 | 0.018401912 |
| TMC8          | 1.615185522 | 0.004329397 | 0.040049374 |
| C7orf60       | 1.335048161 | 0.006180121 | 0.04980902  |
| SLC35G3       | 1.79603454  | 0.002359328 | 0.028151978 |
| SPATA13       | 1.385228328 | 0.002427158 | 0.028599867 |
| FAM116A       | 1.56361684  | 0.000918756 | 0.017877478 |
| GIMAP7        | 1.236558667 | 0.002519675 | 0.02919506  |
| CCDC112       | 1.248322931 | 0.000699685 | 0.016028594 |
| TES           | 1.507784858 | 0.00082177  | 0.017073994 |
| SEMA3D        | 3.378289588 | 9.03E-05    | 0.00872223  |
| SPECC1        | 1.050956465 | 0.006122056 | 0.049460979 |
| NEDD1         | 1.230612366 | 0.001124589 | 0.019278478 |
| PMP22         | 1.441663176 | 1.24E-05    | 0.004370993 |
| KCNJ1         | 1.000507526 | 0.001603344 | 0.023182626 |
| CSF3R         | 2.243083136 | 0.000199163 | 0.011049198 |
| SH2D3C        | 1.822701461 | 0.001832618 | 0.024943157 |
| SNX16         | 1.479966893 | 0.000206272 | 0.011102961 |
| LACC1         | 1.236616145 | 0.002069575 | 0.026507793 |
| HIF3A         | 2.838192027 | 0.001023814 | 0.018570027 |
| IGLL1         | 1.755676478 | 0.000783125 | 0.016602575 |
| DKFZp667G2110 | 1.033370443 | 0.000314172 | 0.012240716 |
| P2RX2         | 1.495358265 | 0.000953302 | 0.018086189 |
| FYN           | 1.23358216  | 0.002232883 | 0.027430074 |
| LIX1L         | 1.072724634 | 0.005593026 | 0.046761587 |
| MEIS2         | 1.129837341 | 0.003838479 | 0.037338644 |

|            |             |             |             |
|------------|-------------|-------------|-------------|
| ZNF610     | 1.254528069 | 5.77E-05    | 0.008053145 |
| CSF1       | 1.379363295 | 0.003254154 | 0.033827294 |
| PLEKHH2    | 1.548295419 | 0.001812187 | 0.024763337 |
| SLC2A14    | 1.641938721 | 0.000602351 | 0.015063312 |
| CD8B       | 1.271978291 | 0.0023698   | 0.028210989 |
| IL15RA     | 1.073720306 | 0.004004717 | 0.038399232 |
| C1QC       | 2.076127472 | 0.000238346 | 0.011579575 |
| FAM98B     | 1.420350319 | 0.000352812 | 0.012360149 |
| PAPLN      | 1.769746665 | 0.000220116 | 0.011376953 |
| C1orf162   | 1.322131511 | 0.001667728 | 0.023710535 |
| TIGIT      | 1.768751306 | 0.000485967 | 0.013799018 |
| NFATC1     | 1.529435449 | 0.001716757 | 0.024006379 |
| GIMAP8     | 1.634024307 | 0.000901654 | 0.017837372 |
| ATP2A3     | 1.489919299 | 0.001951792 | 0.025708252 |
| ST6GALNAC4 | 1.047129598 | 0.004614122 | 0.041549015 |
| RHOC       | 1.029178926 | 0.000635167 | 0.015309991 |
| CD163L1    | 2.62405844  | 0.000647031 | 0.015431998 |
| DNMT3A     | 1.037146801 | 0.001795241 | 0.02460588  |
| TMTC1      | 2.859328032 | 0.002222419 | 0.027382568 |
| PAN3       | 1.233858111 | 0.001153644 | 0.019497347 |
| GOLM1      | 1.89417306  | 0.000393492 | 0.012854122 |
| P2RY6      | 1.754158012 | 0.003583805 | 0.035645009 |
| P2RY13     | 1.615329942 | 0.00186012  | 0.025166469 |
| ARMCX2     | 1.864844929 | 0.000844429 | 0.017306885 |
| DTX3       | 1.421545935 | 0.002194954 | 0.027219455 |
| MEST       | 1.57635577  | 0.002779926 | 0.030761501 |
| MB21D2     | 1.091634341 | 0.003240119 | 0.033750135 |
| NLRC3      | 1.688316437 | 0.001273568 | 0.020554276 |
| PILRA      | 1.483680719 | 8.08E-05    | 0.00872223  |
| STX12      | 1.101927375 | 0.000919845 | 0.017877478 |
| ASB6       | 1.018602191 | 0.002311532 | 0.027874919 |
| HCAR2      | 2.639564968 | 0.002922763 | 0.031739963 |
| WDFY3      | 1.488547899 | 0.003061169 | 0.032669538 |
| FERMT3     | 2.380249666 | 8.08E-05    | 0.00872223  |
| OGT        | 1.008814474 | 0.005266592 | 0.045105928 |
| NCOA3      | 1.429086947 | 0.002935193 | 0.031824168 |
| OLFML2A    | 3.195138142 | 0.005081804 | 0.044008348 |
| LYPD5      | 1.290024682 | 0.000698904 | 0.016028594 |
| KLC1       | 1.120971442 | 0.000404122 | 0.012954159 |
| IKZF3      | 1.536251571 | 0.003768533 | 0.036830235 |
| MICALL2    | 1.147319424 | 0.005988318 | 0.048844385 |
| LRRC70     | 1.297291061 | 0.000214967 | 0.011335849 |
| ARHGAP30   | 1.60531513  | 0.005510996 | 0.046446424 |
| NPM2       | 2.22214267  | 0.00054085  | 0.014452868 |

|          |             |             |             |
|----------|-------------|-------------|-------------|
| TRNT1    | 1.329160303 | 0.000616463 | 0.015131243 |
| BCL6B    | 1.703168211 | 0.000684411 | 0.015932657 |
| SLC16A9  | 3.18593365  | 0.000200702 | 0.011049475 |
| LILRA5   | 1.900645133 | 0.00018784  | 0.010712144 |
| CD247    | 1.403107159 | 0.003924409 | 0.037935958 |
| HEATR3   | 1.313650955 | 0.000921938 | 0.017880184 |
| GEM      | 1.676169507 | 0.001101846 | 0.019128638 |
| CREB5    | 1.49767521  | 0.000222961 | 0.011408959 |
| CLEC7A   | 1.27788916  | 0.005163562 | 0.044555906 |
| RASSF5   | 1.304288247 | 0.001611865 | 0.023240001 |
| BTN3A3   | 2.025197543 | 0.000506102 | 0.014054629 |
| RNASE1   | 1.980213605 | 9.41E-05    | 0.008797851 |
| PRNP     | 1.146152425 | 0.000580233 | 0.014895881 |
| IKZF3    | 2.06313235  | 0.00077937  | 0.016576452 |
| WDR86    | 1.710458309 | 0.004877387 | 0.042898746 |
| PYHIN1   | 2.615228782 | 1.73E-06    | 0.002284534 |
| INO80C   | 1.336009445 | 0.000832653 | 0.01715383  |
| C2CD2    | 2.130140553 | 0.000189004 | 0.0107454   |
| ZNF468   | 1.025066676 | 0.002833494 | 0.031154826 |
| BTN3A1   | 1.297158632 | 0.001420726 | 0.021775935 |
| RNASE1   | 2.07221658  | 9.13E-05    | 0.00872223  |
| OLFML1   | 1.11633996  | 0.001126868 | 0.019278478 |
| TYROBP   | 1.447144869 | 0.00035482  | 0.012382908 |
| C18orf34 | 2.059035966 | 0.000690122 | 0.016010827 |
| UBA3     | 1.459985385 | 0.000337004 | 0.012254849 |
| SYNJ1    | 1.07192483  | 0.005280106 | 0.045172661 |
| DOCK8    | 2.511145398 | 1.18E-05    | 0.004370993 |
| PMEPA1   | 1.596398286 | 0.000334275 | 0.012254849 |
| TCF21    | 2.04299546  | 0.00163861  | 0.023472434 |
| SPRY1    | 1.709106179 | 0.000398688 | 0.012857899 |
| LST1     | 1.48983359  | 0.001565863 | 0.022916601 |
| MAP3K3   | 1.269282355 | 0.002698602 | 0.030242329 |
| FYB      | 1.433123073 | 0.000916728 | 0.017877478 |
| QKI      | 1.797502179 | 0.000484474 | 0.013790312 |
| MS4A7    | 1.474492221 | 0.002833783 | 0.031154826 |
| SLC24A5  | 2.129997252 | 0.000884966 | 0.017713823 |
| PRMT2    | 1.198249396 | 0.003880994 | 0.03765892  |
| RNF216   | 1.159645492 | 0.000978644 | 0.01836396  |
| FAM110A  | 1.548061042 | 0.001523871 | 0.02265869  |
| DPY19L3  | 1.29984522  | 0.00121609  | 0.020103403 |
| CMPK2    | 1.472030053 | 0.001763827 | 0.02446351  |
| ABCG1    | 2.022627975 | 0.00057938  | 0.014895881 |
| C17orf87 | 1.52989802  | 0.00093238  | 0.01793028  |
| ZC3H12D  | 1.579741909 | 0.004246761 | 0.039572439 |

|                  |              |             |             |
|------------------|--------------|-------------|-------------|
| TNFAIP8L3        | 3.23150647   | 8.99E-05    | 0.00872223  |
| ABCG1            | 1.685160362  | 0.001975034 | 0.025930736 |
| UAP1L1           | 2.048084227  | 0.000352033 | 0.012360149 |
| CLEC9A           | 2.192614495  | 0.000256048 | 0.01169459  |
| TPM2             | 2.02297931   | 0.00175733  | 0.024423172 |
| MBNL1            | 1.110255344  | 0.002612774 | 0.029685999 |
| CLEC17A          | 1.299274495  | 0.003433318 | 0.034683141 |
| WARS             | 1.98062938   | 4.54E-06    | 0.003192872 |
| C17orf76         | 3.132010018  | 0.000867129 | 0.017493386 |
| NA               | 1.643247765  | 0.000267057 | 0.011930481 |
| miRNA symbol     | log2FC       | P.Value     | FDR         |
| hsa-miR-1228-5p  | -3.228350247 | 0.022395051 | 0.843052701 |
| hsa-miR-1276     | -3.677628249 | 0.036501016 | 0.843052701 |
| hsa-miR-1469     | -4.705041152 | 0.003406286 | 0.843052701 |
| hsa-miR-18a-5p   | -1.333305991 | 0.006902254 | 0.843052701 |
| hsa-miR-18b-5p   | -3.619377623 | 0.045962111 | 0.843052701 |
| hsa-miR-19a-3p   | -1.149741963 | 0.014454338 | 0.843052701 |
| hsa-miR-202-5p   | -4.192940057 | 0.018819048 | 0.843052701 |
| hsa-miR-203      | -1.807312576 | 0.013739189 | 0.843052701 |
| hsa-miR-219-5p   | -3.11762936  | 0.03602499  | 0.843052701 |
| hsa-miR-222-5p   | -3.839114679 | 0.01525356  | 0.843052701 |
| hsa-miR-2277-5p  | -1.199861087 | 0.00576849  | 0.843052701 |
| hsa-miR-3144-3p  | -3.49389259  | 0.036984152 | 0.843052701 |
| hsa-miR-3150a-5p | -3.731765685 | 0.030399108 | 0.843052701 |
| hsa-miR-3150b-3p | -3.97710253  | 0.016657363 | 0.843052701 |
| hsa-miR-346      | -3.59190521  | 0.045831871 | 0.843052701 |
| hsa-miR-34c-5p   | -1.693761398 | 0.025868716 | 0.843052701 |
| hsa-miR-3611     | -1.495410563 | 0.003417465 | 0.843052701 |
| hsa-miR-3664-3p  | -2.008700869 | 0.038940185 | 0.843052701 |
| hsa-miR-3925-3p  | -3.618634591 | 0.002884694 | 0.843052701 |
| hsa-miR-3942-5p  | -3.352483165 | 0.041428783 | 0.843052701 |
| hsa-miR-4424     | -3.308095237 | 0.024319791 | 0.843052701 |
| hsa-miR-4482-5p  | -2.605695179 | 0.014138    | 0.843052701 |
| hsa-miR-4482-5p  | -2.605695179 | 0.014138    | 0.843052701 |
| hsa-miR-4637     | -2.905732563 | 0.027507717 | 0.843052701 |
| hsa-miR-4728-3p  | -3.470829221 | 0.042138407 | 0.843052701 |
| hsa-miR-487a     | -3.106245758 | 0.035532402 | 0.843052701 |
| hsa-miR-5010-5p  | -3.366899459 | 0.018106845 | 0.843052701 |
| hsa-miR-508-3p   | -3.677151471 | 0.037117638 | 0.843052701 |
| hsa-miR-545-3p   | -2.950782001 | 0.014838947 | 0.843052701 |
| hsa-miR-548ak    | -3.339045779 | 0.025425157 | 0.843052701 |
| hsa-miR-548ap-5p | -4.160341661 | 0.01561358  | 0.843052701 |
| hsa-miR-548d-3p  | -3.421760985 | 0.034371277 | 0.843052701 |
| hsa-miR-548d-3p  | -3.421760985 | 0.034371277 | 0.843052701 |

|                 |              |             |             |
|-----------------|--------------|-------------|-------------|
| hsa-miR-548w    | -3.827245304 | 0.011746697 | 0.843052701 |
| hsa-miR-551b-3p | -3.999937139 | 0.03297371  | 0.843052701 |
| hsa-miR-556-3p  | -3.102621416 | 0.048291998 | 0.843052701 |
| hsa-miR-5698    | -2.541399288 | 0.014266336 | 0.843052701 |
| hsa-miR-590-5p  | -3.088961018 | 0.029623539 | 0.843052701 |
| hsa-miR-597     | -4.168198237 | 0.016154285 | 0.843052701 |
| hsa-miR-600     | -3.315866681 | 0.04565542  | 0.843052701 |
| hsa-miR-1179    | 3.627066913  | 0.012288325 | 0.843052701 |
| hsa-miR-4326    | 4.626483445  | 0.034429194 | 0.843052701 |
| hsa-miR-4474-3p | 3.193854211  | 0.047349323 | 0.843052701 |
| hsa-miR-4532    | 3.941865279  | 0.022800818 | 0.843052701 |
| hsa-miR-488-3p  | 3.472672942  | 0.034428028 | 0.843052701 |
| hsa-miR-940     | 4.268661174  | 0.007736558 | 0.843052701 |

---
