# Supplementary material for: Coding and non-coding gene regulatory networks underlie the immune response in liver cirrhosis
Source: PubMed Central journal article supplement (PMC5371304; doi:10.1371/journal.pone.0174142), 2017-03-29
Supplement: pone.0174142.s002.pdf [file pone.0174142.s002.pdf]

Supplementary Table 2. The function of differentially expressed genes in liver cirrhosis

| GO Term                                                                                                                              | P Value  | FDR      |
|--------------------------------------------------------------------------------------------------------------------------------------|----------|----------|
| GO:0009611~response to wounding                                                                                                      | 4.64E-26 | 8.62E-23 |
| GO:0055114~oxidation reduction                                                                                                       | 2.85E-21 | 5.29E-18 |
| GO:0009063~cellular amino acid catabolic process                                                                                     | 7.50E-16 | 1.44E-12 |
| GO:0016054~organic acid catabolic process                                                                                            | 2.15E-15 | 3.92E-12 |
| GO:0046395~carboxylic acid catabolic process                                                                                         | 2.15E-15 | 3.92E-12 |
| GO:0006952~defense response                                                                                                          | 2.92E-15 | 5.36E-12 |
| GO:0006955~immune response                                                                                                           | 8.98E-15 | 1.67E-11 |
| GO:0002526~acute inflammatory response                                                                                               | 1.28E-14 | 2.37E-11 |
| GO:0009310~amine catabolic process                                                                                                   | 1.83E-14 | 3.41E-11 |
| GO:0006956~complement activation                                                                                                     | 2.40E-14 | 4.46E-11 |
| GO:0002541~activation of plasma proteins involved in acute inflammatory response                                                     | 5.14E-14 | 9.55E-11 |
| GO:0042060~wound healing                                                                                                             | 9.74E-14 | 1.81E-10 |
| GO:0002253~activation of immune response                                                                                             | 2.61E-12 | 4.86E-09 |
| GO:0002252~immune effector process                                                                                                   | 5.02E-12 | 9.33E-09 |
| GO:0016064~immunoglobulin mediated immune response                                                                                   | 5.73E-12 | 1.07E-08 |
| GO:0006954~inflammatory response                                                                                                     | 5.77E-12 | 1.07E-08 |
| GO:0019724~B cell mediated immunity                                                                                                  | 1.64E-11 | 3.04E-08 |
| GO:0002684~positive regulation of immune system process                                                                              | 2.36E-11 | 4.38E-08 |
| GO:0050778~positive regulation of immune response                                                                                    | 2.55E-11 | 4.74E-08 |
| GO:0006958~complement activation, classical pathway                                                                                  | 3.99E-11 | 7.41E-08 |
| GO:0008202~steroid metabolic process                                                                                                 | 1.62E-10 | 3.02E-07 |
| GO:0002455~humoral immune response mediated by circulating immunoglobulin                                                            | 1.92E-10 | 3.57E-07 |
| GO:0045087~innate immune response                                                                                                    | 2.32E-10 | 4.32E-07 |
| GO:0051605~protein maturation by peptide bond cleavage                                                                               | 5.12E-10 | 9.52E-07 |
| GO:0019439~aromatic compound catabolic process                                                                                       | 5.83E-10 | 1.08E-06 |
| GO:0006959~humoral immune response                                                                                                   | 1.13E-09 | 2.09E-06 |
| GO:0002449~lymphocyte mediated immunity                                                                                              | 1.17E-09 | 2.18E-06 |
| GO:0048584~positive regulation of response to stimulus                                                                               | 1.19E-09 | 2.21E-06 |
| GO:0002443~leukocyte mediated immunity                                                                                               | 2.41E-09 | 4.47E-06 |
| GO:0007596~blood coagulation                                                                                                         | 3.51E-09 | 6.52E-06 |
| GO:0050817~coagulation                                                                                                               | 3.51E-09 | 6.52E-06 |
| GO:0007155~cell adhesion                                                                                                             | 1.24E-08 | 2.31E-05 |
| GO:0002460~adaptive immune response based on somatic recombination of immune receptors built from immunoglobulin superfamily domains | 1.33E-08 | 2.46E-05 |
| GO:0002250~adaptive immune response                                                                                                  | 1.33E-08 | 2.46E-05 |
| GO:0022610~biological adhesion                                                                                                       | 1.36E-08 | 2.53E-05 |
| GO:0007599~hemostasis                                                                                                                | 1.74E-08 | 3.24E-05 |
| GO:0006631~fatty acid metabolic process                                                                                              | 1.80E-08 | 3.35E-05 |

|                                                                    |          |             |
|--------------------------------------------------------------------|----------|-------------|
| GO:0055088~lipid homeostasis                                       | 2.09E-08 | 3.89E-05    |
| GO:0043603~cellular amide metabolic process                        | 2.71E-08 | 5.04E-05    |
| GO:0016053~organic acid biosynthetic process                       | 3.56E-08 | 6.61E-05    |
| GO:0046394~carboxylic acid biosynthetic process                    | 3.56E-08 | 6.61E-05    |
| GO:0010033~response to organic substance                           | 3.95E-08 | 7.35E-05    |
| GO:0016485~protein processing                                      | 4.68E-08 | 8.70E-05    |
| GO:0055092~sterol homeostasis                                      | 1.08E-07 | 2.00E-04    |
| GO:0042632~cholesterol homeostasis                                 | 1.08E-07 | 2.00E-04    |
| GO:0051604~protein maturation                                      | 1.32E-07 | 2.46E-04    |
| GO:0006805~xenobiotic metabolic process                            | 1.35E-07 | 2.50E-04    |
| GO:0006732~coenzyme metabolic process                              | 2.21E-07 | 4.10E-04    |
| GO:0006006~glucose metabolic process                               | 2.21E-07 | 4.10E-04    |
| GO:0009719~response to endogenous stimulus                         | 2.33E-07 | 4.34E-04    |
| GO:0005996~monosaccharide metabolic process                        | 3.15E-07 | 5.85E-04    |
| GO:0009074~aromatic amino acid family catabolic process            | 3.21E-07 | 5.97E-04    |
| GO:0009725~response to hormone stimulus                            | 3.28E-07 | 6.10E-04    |
| GO:0051270~regulation of cell motion                               | 4.34E-07 | 8.06E-04    |
| GO:0051241~negative regulation of multicellular organismal process | 5.44E-07 | 0.001011755 |
| GO:0008652~cellular amino acid biosynthetic process                | 6.37E-07 | 0.001183402 |
| GO:0009309~amine biosynthetic process                              | 7.47E-07 | 0.00138879  |
| GO:0001775~cell activation                                         | 7.77E-07 | 0.001443669 |
| GO:0009064~glutamine family amino acid metabolic process           | 9.02E-07 | 0.00167699  |
| GO:0009410~response to xenobiotic stimulus                         | 1.06E-06 | 0.00196748  |
| GO:0006869~lipid transport                                         | 1.26E-06 | 0.002346754 |
| GO:0051186~cofactor metabolic process                              | 1.51E-06 | 0.002797861 |
| GO:0034367~macromolecular complex remodeling                       | 1.52E-06 | 0.002818456 |
| GO:0034369~plasma lipoprotein particle remodeling                  | 1.52E-06 | 0.002818456 |
| GO:0034368~protein-lipid complex remodeling                        | 1.52E-06 | 0.002818456 |
| GO:0019318~hexose metabolic process                                | 2.43E-06 | 0.00451838  |
| GO:0046486~glycerolipid metabolic process                          | 2.88E-06 | 0.005346354 |
| GO:0006928~cell motion                                             | 3.22E-06 | 0.005988764 |
| GO:0030334~regulation of cell migration                            | 3.28E-06 | 0.006089154 |
| GO:0010876~lipid localization                                      | 3.44E-06 | 0.006396151 |
| GO:0019748~secondary metabolic process                             | 6.21E-06 | 0.011542888 |
| GO:0034637~cellular carbohydrate biosynthetic process              | 7.25E-06 | 0.013468979 |
| <b>GO:0042110~T cell activation</b>                                | 8.27E-06 | 0.015363864 |
| GO:0019319~hexose biosynthetic process                             | 8.31E-06 | 0.015439151 |
| GO:0050878~regulation of body fluid levels                         | 1.33E-05 | 0.024780907 |
| GO:0006575~cellular amino acid derivative metabolic process        | 1.35E-05 | 0.025000014 |
| GO:0009065~glutamine family amino acid catabolic process           | 1.41E-05 | 0.026255891 |
| GO:0015918~sterol transport                                        | 1.55E-05 | 0.028809328 |
| GO:0030301~cholesterol transport                                   | 1.55E-05 | 0.028809328 |

|                                                |          |             |
|------------------------------------------------|----------|-------------|
| GO:0046364~monosaccharide biosynthetic process | 1.55E-05 | 0.028809328 |
| GO:0051260~protein homooligomerization         | 1.77E-05 | 0.032862263 |
| GO:0045321~leukocyte activation                | 2.20E-05 | 0.040867543 |
| GO:0006094~gluconeogenesis                     | 2.41E-05 | 0.044737823 |
| GO:0019400~alditol metabolic process           | 2.41E-05 | 0.044737823 |

---
